## Seagrass sediment decomposition and mineralisation

### 1 **Blue carbon sequestration dynamics within tropical seagrass sediments: Long-term** 2 **incubations for changes over climatic scales**

3

4 *Chuan Chee Hoe<sup>A</sup>, John Barry Gallagher<sup>B, C, E</sup>, Chew Swee Theng<sup>D</sup>, Norlaila Binti Mohd.*  
5 *Zanuri<sup>B</sup>*

6 <sup>A</sup>Faculty of Science and Natural Resources, Universiti Malaysia Sabah, 88400, Sabah,  
7 Malaysia

8 <sup>B</sup>Centre for Marine and Coastal Studies, Universiti Sains Malaysia, 11800, Penang,  
9 Malaysia

10 <sup>C</sup>Institute for Marine and Antarctic Studies, University of Tasmania, 7000, Tasmania,  
11 Australia

12 <sup>D</sup>Borneo Marine Research Institute, Universiti Malaysia Sabah, 88400, Sabah, Malaysia

13 <sup>E</sup>Corresponding author. Email: john.barry@usm.my

14

15 **Abstract.** Determination of blue carbon sequestration in seagrass sediments over  
16 climatic time scales relies on several assumptions, such as no loss of particulate organic  
17 carbon (POC) after one or two years, tight coupling between POC loss and CO<sub>2</sub> emissions,  
18 no dissolution of carbonates and removal of the stable black carbon (BC) contribution. We  
19 tested these assumptions via 500-day anoxic decomposition/mineralisation experiments to  
20 capture centennial parameter decay dynamics from two sediment horizons robustly dated  
21 as 2 and 18 years old. No loss of BC was detected, and decay of POC was best described  
22 for both horizons by near-identical reactivity continuum models. The models predicted  
23 average losses of 49% and 51% after 100 years of burial and 20–22 cm horizons,  
24 respectively. However, the loss rate of POC was far greater than the release rate of CO<sub>2</sub>,  
25 both before and after accounting for CO<sub>2</sub> from anoxic particulate inorganic carbon (PIC)  
26 production, possibly as siderite. The deficit could not be attributed to dissolved organic  
27 carbon or dark CO<sub>2</sub> fixation. Instead, evidence based on  $\delta^{13}\text{C}_{\text{CO}_2}$ , acidity and lack of  
28 sulphate reduction suggested methanogenesis. The results indicate the importance of  
29 centennial losses of POC and PIC precipitation and possibly methanogenesis in estimating  
30 carbon sequestration rates.

## Seagrass sediment decomposition and mineralisation

31 **Additional keywords:** sediment geochemistry, diagenesis, carbonate, pyrogenic carbon,  
32 methane, sediment isotope tomography

### 33 **Introduction**

34 Seagrasses, along with mangroves, saltmarsh and seaweeds, are increasingly touted  
35 as a significant global carbon sink (McLeod *et al.* 2011). For seagrass in particular, this  
36 service is based on two separate concepts: sedimentary carbon stocks and rates of  
37 sedimentary carbon sequestration. The stock or storage service concept, in the mitigation  
38 of greenhouse gas emissions, is a scalar concept and conceived at the meadow scale. It has  
39 traditionally been estimated by potential carbon loss to mineralisation should it be  
40 disturbed over a climatic unit of time (Pendleton *et al.* 2012). The depth of such  
41 disturbance, and the extent of its effect on the carbon stock, is dependent on the type of  
42 disturbance (Siikamäki *et al.* 2013; Gallagher 2017) and independent of the time it took the  
43 carbon to accumulate. The sediment found within seagrass beds contains a sizable organic  
44 component consisting of a mix of seagrass litter, associated epiphyte and microalgal  
45 detritus, and additional inputs from adjacent land activities and fluvial deposition as well  
46 as saltmarsh and mangrove ecosystems (Kennedy *et al.* 2010). In contrast, the carbon  
47 sequestration service is a vector concept. Rates of sequestration depend on the balance  
48 between detrital production and mineralisation relative to an alternative and likely non-  
49 vegetated state (Siikamäki *et al.* 2013; Gallagher 2017). Non-vegetated sediments have in  
50 general shown increased rates of mineralisation (Kristensen *et al.* 1995) and mobilisation  
51 of dissolved organic carbon (DOC) during resuspension (Koelmans and Prevo 2003). As  
52 this is a service in the mitigation of global warming, its extent has been traditionally  
53 estimated as the rate at which sedimentary organic mass accumulates over time scales  
54 ranging from inter-decadal to centennial (Duarte *et al.* 2013, Gallagher, 2015),  
55 subsequently integrated across the meadow.

56 Notwithstanding uncertainties about the size of past meadow coverage and the  
57 amount and fate of exported litter (Gallagher 2014; Duarte and Krause-Jensen 2017),  
58 researchers are increasingly recognising that the traditional methods of calculating  
59 sedimentary carbon accumulation rates may have built-in biases (Gallagher 2015; Sophia  
60 and Robie 2016; Chew and Gallagher 2018). For example, previous studies have failed to  
61 subtract allochthonous recalcitrant forms of carbon such as black or pyrogenic carbon from  
62 estimated carbon stocks. Pyrogenic carbon is produced by incomplete combustion of  
63 biomass and fossil fuels. It is considered sufficiently stable to be outside the climatic

## Seagrass sediment decomposition and mineralisation

64 carbon loop (Liang *et al.* 2008; Wang *et al.* 2016), and thus its storage and sequestration  
65 within seagrass ecosystem sediments cannot be counted as a greenhouse gas mitigation  
66 service (Chew and Gallagher 2018). Mass accumulation rates, the product of  
67 sedimentation rates and particulate organic carbon (POC) concentrations, have no assumed  
68 significant losses after one to two years within their surface sediments (Cebrian 1999). The  
69 humification of seagrass, macroalgae and mangrove detritus has been shown to occur over  
70 several months after deposition, becoming more recalcitrant after burial (Middelburg 1989;  
71 Burdige 2007). Further, any such losses are assumed to be tightly coupled with CO<sub>2</sub>  
72 emissions, ostensibly from aerobic mineralisation or sulphate reduction (Burdige 1991)  
73 whereby the release of ammonia can feed further production. Methanogenesis has been  
74 known to play a measurable role within highly organic non-vegetated coastal sediments  
75 (Boehme *et al.* 1996). However, long-term incubation experiments with marine non-  
76 vegetative sediments consisting of predominantly, but not exclusively, phytoplanktonic  
77 sources suggest that POC continues to be lost within deeper and older sediments (Westrich  
78 and Berner 1984; Burdige 1991; Arndt *et al.* 2013; Canuel *et al.* 2017), with further losses  
79 of the POC fraction transformed to a mobile DOC pool (Holmer 1996; Hee *et al.* 2001;  
80 Burdige *et al.* 2016). Furthermore, the CO<sub>2</sub> need not be from organic mineralisation.  
81 Sulphate reduction within non-vegetated coastal sediments has been found to result in  
82 sufficient alkalinisation to produce CO<sub>2</sub> from the subsequent precipitation of CaCO<sub>3</sub> in the  
83 form of particulate inorganic carbon (PIC) (Mucci *et al.* 2000; Rassmann *et al.* 2016).  
84 Should this be a phenomenon within anoxic seagrass sediments, then this apparent  
85 emission source needs to be balanced with PIC dissolution subsequent to re-alkalinisation of  
86 the water column after disturbance of the non-vegetated state. This can reduce the water  
87 column's pCO<sub>2</sub>, which ironically becomes a net CO<sub>2</sub> sink from the atmosphere, the extent  
88 of which depends on the residence time of the water body (Howard *et al.* 2017).

### 89 *Aims*

90 This study aims, for the first time, to use long-term (500 days) 'open' anoxic slurry  
91 incubations to capture the rates and dynamics of POC and black carbon (BC)  
92 mineralisation and decomposition within highly organic seagrass meadow sediments in a  
93 tropical climate. Incubation was followed by a relatively short period of aeration (30 days)  
94 as a model for the immediate effects of disturbance on the mineralisation and  
95 decomposition of both POC and PIC. Younger (1–2 years old) surface sediments were  
96 used to compare the POC and PIC decomposition and mineralisation rates with that of

## Seagrass sediment decomposition and mineralisation

97 deeper, older horizons. This is done by fitting the time series to the most appropriate  
98 diagenetic model (Arndt *et al.* 2013). After sediment deposition ages were determined with  
99 either an evaluated event or  $^{210}\text{Pb}$  geochronology, the model was used to extrapolate any  
100 losses over 100 years for a more considered rate of POC sequestration. The newly  
101 measured POC is then further constrained by measurements of additional diagenetic  
102 variables, namely  $\text{CO}_2$ , coloured dissolved organic matter (CDOM) as a proxy for the  
103 DOC pool, ammonia as evidence of sulphate reduction and PIC, in the form of carbonate,  
104 to disentangle changes in  $\text{CO}_2$  from inorganic and organic dynamics.

## 105 **Materials and Methods**

### 106 *Study site*

107 Two similar subtidal *Enhalus* sp. seagrass meadows in separate branches of the Salut–  
108 Mengkabong estuary were chosen for the study (Fig. 1). The region can be considered as  
109 moderately urban; it is located 20 km north of a city centre (Kota Kinabalu, Sabah,  
110 Malaysia) and within the penumbra of the near-annual southwest Borneo and Sumatra  
111 haze events. These events ostensibly deposit BC into the estuary from peat fires on the  
112 southern part of the island as well as from slash-and-burn land-clearing activities (Gaveau  
113 *et al.* 2014; Chew and Gallagher 2018). The two bays are both turbid and shallow (1–3 m)  
114 and surrounded by mangrove forests with exposed intertidal mud banks. One meadow,  
115 within the Salut branch, was used to collect sediments for the slurry incubations, while the  
116 other meadow, within the Mengkabong branch, was used to constrain the Salut meadow’s  
117 geochronology. This was necessary for disentangling and identifying likely and known  
118 regional storm depositional events from unknown local disturbances (Gallagher and Ross  
119 2018).

### 120 *Sediment collection and incubation*

121 The sediments for the decomposition experiment were taken in 2016 from 22 cores  
122 from five sites in the estuary, spaced ~30 to 150 metres apart. The cores were transported  
123 back to the laboratory under ice (ambient temperature in icebox = 10.2 °C), where the  
124 surface 2 cm and 20–22 cm horizons were extracted and pooled. The latter horizon was  
125 taken a short distance ahead of the start of a transition to a lower, more fibrous brown  
126 facies (>26 cm). Samples from each sediment horizon were pooled in the manner of  
127 Westrich and Berner (1984) after wet sieving (1 mm) with previously filtered boiled  
128 seawater to remove large shells, debris and benthic fauna. After this, the pooled samples  
129 were divided into four separate Mason jars under nitrogen, and filtered boiled seawater

## Seagrass sediment decomposition and mineralisation

130 was added to make up a 400 cm<sup>3</sup> slurry with a final water content of 81.9%. Before the  
131 start of the incubation, the slurries were bubbled with N<sub>2</sub> for 25 min and the anoxic status  
132 was checked (YSI ProDSS probe) before the Mason jar lids were replaced. To ensure that  
133 the sulphate supply was not limiting sulphate reduction, additional sulphate was added in  
134 stoichiometric proportion to the measured amount of CO<sub>2</sub> emitted. This was done after the  
135 first month and again a further three times over the course of the first 300 days of the  
136 experiment. As a further precaution, sulphide and CO<sub>2</sub> traps were placed in the jars'  
137 headspace to both inhibit and control any build-up of metabolites and to measure net  
138 accumulative mineralisation. The sulphide traps were constructed by using epoxy to fasten  
139 a 110-mm-diameter Whatman No. 1 filter paper saturated with 1‰ zinc acetate to the  
140 underside of each jar lid. These were strategically folded to present a large total surface  
141 area and were placed alongside lead acetate paper strips to visibly detect any ongoing  
142 emissions of H<sub>2</sub>S. The filter papers were refreshed with fresh solution after every sampling  
143 procedure. The CO<sub>2</sub> traps contained 2 to 3 g of dried high-absorbance-capacity soda lime  
144 (Dharmakeerthi *et al.* 2015) placed in 15 mL polypropylene centrifuge tubes. The tubes  
145 were open to the headspace and were replaced after each sampling time for further  
146 gravimetric measurements of CO<sub>2</sub> accumulation rates. An additional set of soda lime traps  
147 was also placed in four Mason jars filled with filtered boiled seawater (400 cm<sup>3</sup>), which  
148 were added to the incubation cohort as CO<sub>2</sub> procedural blanks (Keith and Wong 2006).

149 The Mason jar sediment slurries and blanks were all incubated at 30 °C in a  
150 constant-temperature room in the dark (covered in Al foil as a precaution against  
151 disturbance). The slurries were sampled after 7, 21, 42, 63, 105, 140, 175, 210, 308, 365,  
152 400, 420, 470 and 500 days for POC, CDOM, ammonia, pH, and CO<sub>2</sub>. A Day 0 sample for  
153 POC was added after the first year. These were taken from the remaining pooled sediments  
154 (stored at -20 °C) and replicated with sediments from corresponding horizons within the  
155 sediment core used for the meadow's geochronology. At selected times, samples were  
156 taken for δ<sup>13</sup>C<sub>POC</sub>, C:N<sub>POC</sub> ratios for both horizons and δ<sup>13</sup>CO<sub>2</sub> trapped by the soda lime for  
157 the surface sediments.

158 After 500 days, additional aerated filtered seawater was added to the jars to bring the  
159 volume to back to 400 cm<sup>3</sup> and the pH was adjusted to 8.5 with NaOH (Analar). The  
160 slurries were again kept in the dark at 30 °C and aerated for 30 days. To remove any  
161 possible organic and BC aerosols that might contaminate the slurry, the air was first passed  
162 through HEPA filters. The filters also supported a coarse polyester mat impregnated with  
163 charcoal. The pH of the slurry was adjusted every few days to maintain acidity between

## Seagrass sediment decomposition and mineralisation

164 pH 7 and 8, and distilled water was added to replace any evaporative loss (Westrich and  
165 Berner 1984).

### 166 *Sampling and analysis protocols*

167 The Mason jars were reopened under a N<sub>2</sub> atmosphere and the pH of the slurry water  
168 was measured after the sediment had settled (ATC portable PH-107 (PH-009)), and their  
169 anoxic status was checked (YSI ProDSS). For sampling of the slurry, a cut-off syringe was  
170 used to extract 10 cm<sup>3</sup> of slurry after thorough mixing; the subsamples were placed in 15  
171 cm<sup>3</sup> polypropylene centrifuge tubes and frozen at -20 °C before analysis. The remaining  
172 slurry was then bubbled with N<sub>2</sub> for two minutes as a precaution to maintain the anoxic  
173 conditions within the jar. The lids of the jars were then resealed under N<sub>2</sub> after the soda  
174 lime traps were removed, capped and replaced with identical traps. The traps were  
175 immediately oven dried and reweighed after first softly cleaning the surface of the  
176 centrifuge tubes of any accumulated red biofilm, and CO<sub>2</sub> was determined gravimetrically  
177 (Keith and Wong 2006). Blanks indicated no significant leakage of air into the Mason jars  
178 and typically showed an increase in weight of ~0.0332 g (standard error (SE) = 0.014, *n* =  
179 4), a value 68% less than the weight increase from the traps in the jars containing slurry  
180 samples.

181 After thawing, the slurry samples were centrifuged at 4000 rpm for 20 minutes to  
182 separate the pore water for measurements of CDOM<sub>440nm</sub> (Harvey *et al.* 2015), ammonia  
183 (Strickland and Parsons 1968) and salinity (refractometer). The remaining sediment plug  
184 was then dried at 105 °C and the amount of water and sediment was noted to calculate the  
185 amount remaining in the mason jars for CO<sub>2</sub> accumulation as dry weight of sediment after  
186 correcting for salinity (Lavelle *et al.* 1985). Particulate organic matter (POM), PIC and  
187 black organic matter (BOM) from the dried sediment slug was measured gravimetrically  
188 by loss on ignition (LOI<sub>0.45g</sub>) in a laboratory furnace (Carbolite CWF 1.8 L; Heiri *et al.*  
189 2001; Chew and Gallagher 2018). Additional inter-batch corrections resulting from  
190 possible furnace aging and procedural handling differences were performed using in-house  
191 local sediment standards taken from the middle of the cores (*n* = 5) and randomly placed  
192 within the furnace. Standards were previously dried (60 °C) and stored frozen (-20 °C).  
193 All POM and BOM values were then converted to carbon content using a local calibration  
194 regression. The regression was constructed previously from sediments taken from Salut-  
195 Mengkabong seagrass and mangroves (Chew and Gallagher 2018) using the same furnace  
196 and in-house sediment standards. A coefficient of 0.273 used to transform the LOI<sub>550-950°C</sub>  
197 to PIC by assuming the carbonate species to be calcium salt (Santisteban *et al.* 2004).

## Seagrass sediment decomposition and mineralisation

198 However, it should be noted that a later analysis of the data suggested that the increase in  
199 carbonate may have been from ferrous salt. Until certainty is established, in both the form  
200 of thermal decomposition equation during the analysis and identity of the salt, all PIC  
201 contents are reported as  $\text{CaCO}_3$ . All measurements are presented, except for  $\text{CDOM}_{440\text{nm}}$ ,  
202 in molar units for stoichiometric comparisons.  $\text{CDOM}_{440\text{nm}}$  was converted to DOC to give  
203 the organic dissolved pool dynamic an order of magnitude significance with other carbon  
204 variables. As far as we are aware, the calibration used for the conversion is the only one  
205 available for 440 nm determinations for an estuarine system (Harvey *et al.* 2015). The  
206 dataset is provided in the Supplementary Material should it be necessary for readers to  
207 rework the  $\text{CDOM}_{440\text{nm}}$  and PIC content in light of new information.

208 Analyses of stable POC isotopes of  $\delta^{13}\text{C}$  and their C/N ratios were performed on the  
209 two horizons across separate mason jars at selected times (Days 0 and 210). Before  
210 analysis, the samples were dried and vacuum sealed and sent to the Canadian Rivers  
211 Institute, University of New Brunswick Nature Laboratory (SINLAB). Re-drying after  
212 acidification (10% HCl (Analar)) to remove PIC was performed before analysis at the  
213 institute. No isotope or element analysis was done for the local source materials, which  
214 would typically be required for an estimation of their relative proportions. Nevertheless,  
215 estimations were gauged on the average  $^{13}\text{C}_{\text{POC}}$  and N:C endpoint signatures of seagrass,  
216 mangrove leaves and suspended particulate matter, using a model constructed for a number  
217 of tropical lagoons (Gonneea *et al.* 2004; Chen *et al.* 2017). In addition, stable isotopes of  
218  $\delta^{13}\text{CO}_2$  trapped by the soda lime (days 7, 210, 308 and 500) were measured from a surface-  
219 horizon mason jar replicate. The jar was selected at random, and the analysis at the Central  
220 Science laboratory was performed by mixing ground samples and subsamples under Ar  
221 and placing ~2.5 mg into preflushed (Ar) vacutainers. The  $\text{CO}_2$  was released after  
222 dissolving the powder with pure phosphoric acid before injection. Handling errors were  
223 tested on one sample (mean,  $-19.78$ ; SE,  $\pm 0.98$ ,  $n = 4$ ). Note that limited resources  
224 precluded any additional isotope analysis of either sediments or soda lime.

225 Sediment cores for the geochronology were collected using a sliding hammer Kajak  
226 corer (UWITEC, Austria) equipped with a 6 cm internal diameter polycarbonate core tube;  
227 the sediment–water interface was stabilised with a porous polyurethane foam plug. The  
228 core was transported vertically under ice to the laboratory for push extraction. Water  
229 content, bulk density, pore water salinity and loss on ignition at 550 °C and 950 °C were  
230 measured every 2 cm (Gallagher and Ross 2017). The remaining sediment for each  
231 horizon was used to determine particle size (laser diffraction, LSST-Portable, Sequoia,

## Seagrass sediment decomposition and mineralisation

232 model: 220 Type B); after drying (50 °C) and storage for three months, <sup>210</sup>Pb, <sup>226</sup>Ra and  
233 <sup>137</sup>Cs radionuclide analysis was performed using gamma spectroscopy at the Malaysian  
234 Institute of Nuclear Technology (MINT).

### 235 *Decomposition model*

236 The reactivity continuum model was chosen to model the POC decomposition time  
237 series (Boudreau 1991; Arndt *et al.* 2013; Mostovaya *et al.* 2017). Exploratory analysis  
238 indicated that this gave the best fit and was the most parsimonious descriptor of the POC  
239 dynamics over single and multi G models (Arndt *et al.* 2013). The model fits a continuous  
240 distribution of organic matter decomposition, from labile to increasingly recalcitrant, and  
241 was calculated as follows:

$$242 \quad \frac{POC_t}{POC_0} = \left( \frac{a}{a+t} \right)^v, \quad (1)$$

243 where  $a$  is the apparent age of the organic mixture (years) within the deposit, as a measure  
244 of its degradability relative to an apparent age at the time of deposition. The exponent  $v$  is  
245 the gamma distribution coefficient, which describes the labile–recalcitrant distribution and  
246 dominance (1 to 0, respectively) of the sediment horizon’s organic mix. Taken together,  
247 the initial first-order decomposition coefficient,  $k_0$ , is defined as  $v/a$ , which becomes  
248 increasingly recalcitrant with incubation and burial time  $t$ . The parameter solutions were  
249 calculated iteratively using a nonlinear least squares parameter estimation within the  
250 platform SigmaPlot 12.0. It should be noted that there is a rival continuous diagenetic  
251 model. The model, ostensibly constructed within phytoplanktonic- and bacteria-dominated  
252 sediments, uses a power function to describe how organic matter becomes increasingly  
253 recalcitrant over apparent time (Middelburg 1989). While the two models are equivalent  
254 mathematically (Tarutis 1993) when applied within closed systems such as jars (i.e., no  
255 sediment accretion), the sediment’s mix of seagrass litter, microalgae and mangroves (see  
256 Results), with very different intrinsic reactivities (Middelburg 1989; Kristensen 1994),  
257 would seem more aligned with an RC explanation than a relatively less parsimonious  
258 power model as a sum of differing degrees of aging across different organic sources.

### 259 *Geochronology*

260 Sediment isotope tomography (SIT) was used to model a continuous <sup>210</sup>Pb  
261 geochronology down the sediment core’s uninterrupted depositional regions (Gallagher  
262 and Ross 2017). The model describes how the <sup>210</sup>Pb activity of sedimentary horizons can  
263 be fitted to a function that includes the changes in the <sup>210</sup>Pb flux and sedimentation



## Seagrass sediment decomposition and mineralisation

264 velocity as the  $^{210}\text{Pb}$  decays over time (Carroll *et al.* 1999). The algorithm employs a  
265 parsimonious inverse solution to best simulate the  $^{210}\text{Pb}$  profile by solving for the model's  
266 parameters for maximum disentanglement of the flux and sedimentation velocity terms  
267 (Liu *et al.* 1991). Further constraints and evaluations of solutions can be made by the  
268 presence of known events (Carroll *et al.* 1999). Such events are traditionally peaks or  
269 horizons of  $^{137}\text{Cs}$  from atomic fallout within baseline sediments and depositional facies  
270 characteristic of surrounding material brought in by storms, earthquakes, floods or  
271 tsunamis.

272 Supporting data, additional figures and method details can be found in the electronic  
273 Supplementary Material.

## 274 **Results**

### 275 *Sediment core descriptions*

276 The first 23 cm of the Salut and 25 cm of the Mengkabong meadows were visibly  
277 muddy (black) with no evidence of bioturbation. Below the 23 and 25 cm horizons, the  
278 character of the sediment visibly changed to a coarser mixture of more compact light and  
279 dark brown sediments containing a plethora of shell and mangrove wood debris (refer to  
280 supplementary Fig. S2). No sulphide could be detected by smell or with lead acetate strips  
281 left in the sediment for a minute while they were extruded into receiving tubes before  
282 separation.

### 283 *Sediment horizon organic composition*

284 The  $^{13}\text{C}_{\text{POC}}$  and their N:C ratios taken through the incubation did not appear to  
285 change and the two horizons exhibited near identical signatures (Table 1). These signatures  
286 converged even further when the effects of diagenetic transformations were considered  
287 (Galman *et al.* 2008; Galman, Rydberg *et al.* 2009). Interestingly, it was found that  
288 seagrass litter was likely a minor component (around 5%). The remaining components of  
289 surface-suspended matter, ostensibly microalgae, and mangrove sources made up the  
290 remaining 25% and 70% respectively (refer to Supplemental Material), in agreement with  
291 other ecosystems in the region (Chen *et al.* 2017).

### 292 *Geochronology*

293 While the depth of the storm facies were similar, it was clear from the  $^{210}\text{Pb}$  activity  
294 profiles that the sedimentation dynamics within the baseline sediments were very different.  
295 The Salut meadow, an embayment isolated at the head of the branch and fed by a rivulet,

## Seagrass sediment decomposition and mineralisation

296 supported peaks in activity at around 10 cm (Fig. 2), in contrast to a general decay in  $^{210}\text{Pb}$   
297 activity from the surface of the Mengkabong meadow (Fig. 2), an embayment isolated  
298 from the main branch. The difference in dynamics was also highlighted in the inability to  
299 detect any  $^{137}\text{Cs}$  activity from atomic fallout events within Salut sediments, which were  
300 evident as significant  $^{137}\text{Cs}$  activity between 5 cm and 13 cm, peaking at 5 cm down the  
301 Mengkabong meadow core. This relatively shallow signal is consistent with blow back of  
302 fallout from the 2011 Fukushima Daiichi nuclear accident (Kaeriyama 2017).

303 When the SIT solution for the Mengkabong system was constrained by the timing of  
304 the Fukushima fallout, the depositional event's age was estimated as ca. mid-1990s. The  
305 only recent weather event of note was from the passage of Tropical Storm Greg  
306 (December 1996). The storm is regarded as a once in 400 years occurrence for this region,  
307 which is commonly known as 'The Land below the Wind' due to its location south of the  
308 influence of the Typhoon Belt. The 1996 storm triggered floods that severely affected the  
309 west coast of the state (Abdullah and Tussin 2014), and a local resident shared his  
310 experience as a witness to a coastal surge of ~4 m within the adjacent mangrove forests  
311 (Mohd. Asri Mohd. Suari, personal communication). With the confirmation that the  
312 depositional event was likely to be Tropical Storm Greg, the SIT model now adds  
313 constraints for the Salut meadow baseline sediments of age no older than 1996. Based on  
314 these solutions, the origin of the very different  $^{210}\text{Pb}$  dynamics becomes apparent. In Salut,  
315 both the flux of the meadow's excess  $^{210}\text{Pb}$  activity and the sedimentation rates fell over  
316 time. In Mengkabong, rates of sedimentation and  $^{210}\text{Pb}$  activities remained relatively  
317 constant ( $220 \text{ g m}^{-2}$  per year, Fig. 2) and were only interrupted by an increase consistent  
318 with shoreline development during a peak in annual rainfall (ca. 2005, unpublished data).  
319 These show relatively high sequestration rates near the top of the range, even before any  
320 correction for loss over time (Fig. 2).

### 321 *Incubation experiment*

322 Throughout the incubation experiment, the pH of both surface sediments and  
323 sediments taken from 20–22 cm became increasingly acidic over time (Fig. 3). The older  
324 sediments taken from 20–22 cm were more acidic and remained invariant and acidic.  
325 Surface sediment slurries, in contrast, were initially less acidic; however, their acidity  
326 increased over time, reaching an asymptote after 300 days equal to that of the older  
327 sediment slurry. The experiment failed to detect the presence hydrogen sulphide within the

## Seagrass sediment decomposition and mineralisation

328 jar's headspace (no blackening of the lead acetate strips) that would infer ongoing sulphate  
329 reduction.

330 While the initial BC represented a modest fraction of the POC (0.079 and 0.067  
331 mole/100 g or 11% to 13%), its influence on the POC dynamics was not apparent as there  
332 was no significant decay in the BC content over the 500 days, and RC solutions with the  
333 time series failed to converge. The anoxic decay of POC for the surface and older 20–22  
334 cm horizon sediments fitted the RC model well, and the separation of the terms was within  
335 acceptable limits (Fig. 4). Surface sediment POC content was greater than sediments taken  
336 from 20–22 cm. However, we found no significant difference in their RC decay and  
337 apparent age parameters for the decomposable fraction (Fig. 5) despite different  
338 interdecadal depositional ages (18 years). Projections suggested that both horizons would  
339 have lost close to 30% of their POC content within the first several years (6 to 7)<sup>1</sup>.  
340 Nevertheless, the overarching dynamics were such that both horizons converged to losses  
341 of around 49% and 51% after 100 years of burial.

342 In contrast to POC, the dynamics of PIC, DOC and NH<sub>3</sub> were not continuous. After  
343 around 300 days, the carbonate content started to increase for both sediment horizons and  
344 appeared to move toward an asymptote. This was accompanied by an increase in ammonia  
345 and a decrease in DOC content (Fig. 3) after the ammonia content had first fallen and the  
346 DOC content increased (Fig. 3). DOC and ammonia pools were notably an order of  
347 magnitude smaller than POC. Only the cumulative CO<sub>2</sub>, after correction for PIC  
348 generation after the 300 days, showed steady-state dynamics which slowed towards an  
349 asymptote (Fig. 6). However, there appeared to be a notable deficit in the amount of CO<sub>2</sub>  
350 emitted for the amount of POC decomposed, in particular for the deeper, older sediment  
351 horizon. Furthermore, the  $\delta^{13}\text{C}_{\text{POC}}$  isotopic signatures were not coupled to each other. The  
352  $\delta^{13}\text{CO}_2$  values extracted from the soda lime were both relatively constant and very much  
353 heavier and relatively constant than the POC source mix. This was  $-19.78 \pm 1.95$  ( $n = 4$ ) at  
354 Day 7,  $-17.74$  ( $n = 1$ ) at Day 189,  $-19.30$  ( $n = 1$ ) at Day 308 and  $-18.56$  ( $n = 1$ ) at Day  
355 500, the end of the incubation experiment. Meanwhile, at the same time, the ammonia,  
356 DOC and PIC contents in the sediment slurry remained relatively constant up until around  
357 day 365, when a change in trend was observed (Fig. 3). From Day 365 until the end of the  
358 incubation experiment, both PIC and ammonia levels in the surface sediment slurry

---

<sup>1</sup> The 30% was calculated as the time of symmetry of the decay series second derivative as percentage lost over percentage of time over a span of 100 years ( $\Delta\text{lost}/\Delta t = 1$ ). Although it is a continuous function, as both scales are of the same magnitude, it thus marks the threshold time of a significant slowdown in decomposition.

## Seagrass sediment decomposition and mineralisation

359 increased, with an increase of 46.48% (SE = 3.91,  $n = 4$ ) in PIC and 60.86% (SE = 1.57,  $n$   
360 = 4) in ammonia levels, while DOC levels dropped by as much as 73.77% (SE = 8.75,  $n =$   
361 4) over the same period of time. Meanwhile, for the sediment slurry taken from 20–22 cm,  
362 PIC and ammonia levels increased by 50.57% (SE = 1.44,  $n = 4$ ) and 73.19% (SE = 2.17,  $n$   
363 = 4), respectively, while DOC levels dropped by 28.44% (SE = 4.89,  $n = 4$ ).

### 364 *Aeration incubation*

365 The short aeration pulse over 30 days after the completion of the 500-day anoxic  
366 incubation showed a large decrease in POC (18.86%, SE = 4.09,  $n = 4$  for surface  
367 sediments; 16.99%, SE = 5.04,  $n = 4$  for sediments from 20–22 cm), outside that of the  
368 parameters of the anoxic mineralisation models (Fig. 4). This increase in decomposition  
369 was also in line with a disproportionate increase in DOC over the anoxic mineralisation,  
370 confirming that for both horizons, organic aging had little effect on the recalcitrance of the  
371 buried POC.

## 372 **Discussion**

### 373 *Decomposition*

374 Assuming the incubation was sufficiently long to capture interdecadal decay parameters, it  
375 appears that POC deposited, on average within one to two years of deposition may suffer  
376 significant losses over climatic scales (49% to 51%). However, we must suggest caution in  
377 applying the surface horizon extrapolations as a generalisation to seagrass beds in other  
378 locales, as such sediments will inevitably change their redox status from an aerobic to an  
379 anaerobic dominated form of mineralisation. Aerobic mineralisation is clearly the more  
380 rapid of the two, the result of greater efficiency in the mineralisation of the recalcitrant  
381 fractions (Kristensen *et al.* 1995). As well as changing redox conditions, the nature of the  
382 organic mixture will likely affect the decay parameters of the RC model. Clearly, the  
383 remaining half of the organic carbon, a seemingly recalcitrant fraction, is more than can be  
384 accounted for by the <10% contribution of the BC alone. It is also unlikely in this case that  
385 any presence of phytolith occluded carbon was responsible given that the BC methodology  
386 may have inadvertently included this form (Chew and Gallagher 2018). What remains is  
387 up to speculation; it may consist of bacterial necromass (Burdige 2007) and—an  
388 increasingly important vector, especially within Southeast Asian coastal ecosystems—  
389 microplastics (Nor and Obbard 2014; Li *et al.* 2019). While microplastics have turnover  
390 times of over 1000 years (Gewert *et al.* 2015), their amounts as carbon within soils and

## Seagrass sediment decomposition and mineralisation

391 sediments remain largely unknown. Some values have been estimated for terrestrial soils  
392 (Rillig 2018), ranging from 0.1–5% of POC for pristine environs to as much as 6.7% by  
393 soil weight.

394        Whatever value the overall decay parameters may take over space or time, it remains  
395 puzzling that we found little difference in the POC decomposition model parameters  
396 between the surface and the deeper sediment horizons. This was not apparent in coastal  
397 non-vegetative sediments, which are dominated by more labile phytoplanktonic organic  
398 sources (Burdige 1991; Zimmerman and Canuel 2002). This can be explained by two  
399 possible theories: either the sediments in these types of meadows were well mixed, which  
400 is unlikely given the presence of  $^{137}\text{Cs}$  peaks and  $^{210}\text{Pb}$  decay series, or the stable isotope  
401 signatures and recalcitrance are not covariant down the sediment columns. For the latter to  
402 be consistent, mangrove sources would need to balance an increase in recalcitrance  
403 between or within other organic sources as they are buried over time. In essence, a mix of  
404 the reactivity continuum and power models would best describe this. However, it cannot  
405 be discounted that changes in physical protection and benthic consumption parameters  
406 may also play some role (Arndt *et al.* 2013).

### 407 *Diagenesis and the coupling between $\text{CO}_2$ and decomposition*

408        The mineralisation and decomposition series have several notable features. These are  
409 seemingly punctuated dynamics of carbonate, ammonia and DOC, the  $\text{CO}_2$  deficits with  
410 POC decomposition, and the notably heavier  $^{13}\text{CO}_2$  signature over that of  $^{13}\text{C}_{\text{POC}}$ . These  
411 dynamics suggest that the incubation experiment was not at a steady state as different  
412 diagenetic processes switched on and off. How this affects the decompositional model's  
413 parameters is uncertain, but it is unlikely that the result is an underestimate, given that the  
414 observed diagenetic switches likely reflect a resource limitation that the incubation failed  
415 to supply. Nevertheless, this limitation is common to any natural perturbation experiment  
416 attempting to discover what is possible under a different set of conditions than that which  
417 may be encountered in other systems.

418        Within the limits of our monitored variables, the results imply that the initial fall in  
419 ammonia content under dark anoxic conditions is synonymous with coupled dissimilatory  
420 nitrate reduction (DNRA) and denitrification by anammox autotrophic  $\text{CO}_2$  fixation (Ni  
421 and Zhang 2013). Indeed, recent work has also shown an unexpectedly high degree of  
422 anammox and DNRA in the upper muddy seagrass sediments of a subtropical lagoon (Salk  
423 *et al.* 2017). Nevertheless, the relatively small changes in  $\text{NH}_3$  indicate that any dark  $\text{CO}_2$

## Seagrass sediment decomposition and mineralisation

424 fixation would not have affected the overall CO<sub>2</sub> dynamics, even after considering a  
425 stoichiometry of C:NH<sub>3</sub> of 15:1 (Koeve and Kähler 2010). Although, it could be argued  
426 that the production of archaeal necromass may have contributed to an increasingly  
427 recalcitrant pool of POC over time (Burdige 2007), the extent to which this would  
428 contribute to the decomposition dynamics would depend, in part, on the supply of nitrate  
429 for coupled DNRA. A reduction in the supply of nitrates may perhaps be responsible for a  
430 change to another mineralisation process responsible for the increase in both NH<sub>3</sub> and PIC  
431 after 300 days.

432 Anoxic PIC and NH<sub>3</sub> production within marine coastal sediment, while consistent  
433 with sulphate reduction (Burdige 1991; Mucci *et al.* 2000), is also inconsistent with  
434 several sedimentary parameters and observations. First, we could not detect any H<sub>2</sub>S  
435 produced within the Mason jar headspace throughout the incubation period. Second, molar  
436 NH<sub>3</sub>:CO<sub>2</sub> ratios were clearly an order of 10<sup>3</sup> larger than those found for marine sediments  
437 dominated by sulphate reduction (Burdige 1991). What is not clear are the reasons for the  
438 increase in PIC, of sufficient amounts to affect the CO<sub>2</sub> dynamics. Nevertheless, the lack  
439 of evidence for significant levels of sulphate reduction and alkalisation points to another  
440 type of mineralisation, one that can support a suitable acidic microenvironment. Recently,  
441 it has been demonstrated that an iron-reducing bacterium can precipitate siderite (FeCO<sub>3</sub>)  
442 within acidic sediments at ambient temperatures (30 °C). It was suggested that  
443 alkalisation at the cell walls was induced mainly by its production of NH<sub>3</sub>. Indeed, the  
444 dynamics of the parameters measured herein fall within the scientific justification of  
445 inference to the best explanation (Lipton 2000). The sediments were acidic and there was a  
446 parallel rise in NH<sub>3</sub> production with PIC outside the stoichiometry of sulphate reduction.  
447 Furthermore, additional analysis of selected remaining sediment samples retained  
448 throughout the incubation experiment indicated that the total iron content was sufficient to  
449 support siderite formation (0.051 mol 100 g<sup>-1</sup>, SD = 0.0064, *n* = 60; see Supplementary  
450 Material), but only to levels to which the carbonate appears to be reaching an asymptote  
451 (~0.15 mol 100 g<sup>-1</sup>, Fig. 3).

452 What is clear, however, is that the overall CO<sub>2</sub> dynamics observed fall well short of  
453 accounting for the continued loss of POC irrespective of PIC and DOC. By itself, this  
454 implies that there must be another mineralisation product. As far as we are aware, methane  
455 formed from methanogenesis is the remaining alternative. Methanogenesis would result in  
456 the release of both CO<sub>2</sub> and CH<sub>4</sub>, within its own sedimentary niche, where any iron

## Seagrass sediment decomposition and mineralisation

457 reducers cannot directly compete (Bray *et al.* 2017). While we did not measure methane  
458 during this incubation, the supposition is supported by relatively constant  $^{13}\text{C}_{\text{POC}}$  values  
459 and considerably heavier  $^{13}\text{CO}_2$  ratios over the incubation (Table 1 and 2). Such patterns  
460 have also been found for highly organic coastal marine sediments where a considerably  
461 lighter  $^{13}\text{CH}_4$  (~58.9‰) balances out the heavier  $^{13}\text{CO}_2$  (~19.2‰) fraction, to maintain a  
462 constant heavy source of  $^{13}\text{C}_{\text{POC}}$  over time (Boehme *et al.* 1996). Why methanogens should  
463 dominate mineralisation over sulphate reduction is not clear. Perhaps it is due to the high  
464 acidity of sediments seemingly supplied from the adjacent mangrove mudflats (Marchand  
465 *et al.* 2004) and iron reducing bacteria (Koschorreck 2008).

### 466 **Conclusions**

467 The incubation experiment appears to capture the long-term decomposition parameters for  
468 POC. The RC model seems to indicate that current estimates of carbon sequestration may  
469 be significantly overestimated, in this case by around 50%, unless corrections can be made  
470 for loss over centennial time scales. Furthermore, much remains to be investigated on the  
471 coupling of POC losses to greenhouse gas emissions that have different atmospheric  
472 warming effects and the roles of processes post disposition, such as dark  $\text{CO}_2$  fixation and  
473 carbonate formation on net  $\text{CO}_2$  emissions. Without certainty in both the estimates and the  
474 conceptual model, there will not be sufficient certainty in the estimates of carbon storage  
475 and sequestration services rendered by seagrass ecosystems for use in cap-and-trade  
476 carbon markets to embrace these ecosystems as part of a solution to climate change.

### 477 **Conflicts of interest**

478 The authors declare that they have no conflicts of interest.

### 479 **Declaration of funding**

480 This research was funded in part by the Malaysian Ministry of Science Technology and  
481 Innovation (FRG0424-SG-1/2015), which funded the stable isotope analysis and the rental  
482 of the boat used in the collection of the sample cores.

### 483 **Author contributions**

484 C.C.H. and J.B.G. assisted in fieldwork and design of equipment and analysis of the iron  
485 content. C.C.H. carried out the incubation experiment and the remaining analysis  
486 variables, created the figures and tables, compiled the supplemental material and the  
487 statistical analyses within the tables and contributed to the modelling. J.B.G. was

## Seagrass sediment decomposition and mineralisation

488 responsible for the concept, the final modelling solution and led the writing of the  
489 manuscript. C.S.T. collected cores and performed the SIT  $^{210}\text{Pb}$  event geochronology  
490 under supervision from J.B.G. N.M.Z. provided the statement on recalcitrant carbon in the  
491 form of micro plastics found in the discussion. All authors approved the final version of  
492 the manuscript and agree to be accountable for all aspects of the manuscript.

### 493 **Acknowledgments**

494 Our thanks go to our boatman Awang Azmee and Michael Yap Tzuen-Kiat for help in  
495 collection and analysis of the samples.



## Seagrass sediment decomposition and mineralisation

496 **Fig. 1.** The Salut-Mengkabong estuary site used in the study. Salut is the southern arm of  
497 the estuary, while Mengkabong is the lagoon situated to the North. The sites at which the  
498 seagrass sediments were obtained for the incubation experiment are demarcated by black  
499 triangles ( $\blacktriangle$ ), while the sample cores used for SIT data are marked by white circles  
500 ( $\circ$ ). The seagrass distribution information is based on collective indigenous knowledge,  
501 while the mangrove distribution is obtained from the World Atlas of Mangroves Version 3  
502 (Spalding *et al.* 2018) and from Google Earth. (Map data: Google, 2019;  
503 Landsat/Copernicus, Digital Globe, Bornean Biodiversity & Ecosystems Conservation  
504 (BBEC) Sabah and WWF Malaysia, 2017.) The line map was produced with QGIS v3.6.0  
505 and Adobe Illustrator CS6.

506 **Fig. 2.** Radiogeochronological profiles down the upper seagrass sediments of Salut-  
507 Mengkabong estuary/lagoon. The shaded area represents the mangrove deposition event.  
508 (a) The  $^{137}\text{Cs}$  activity ( $\blacktriangleright$ ) down the Mengkabong meadow sediments; no activity could be  
509 detected down the Salut meadow sediments. (b, c) The respective supporting  $^{226}\text{Ra}$  ( $\bullet$ ) and  
510 total  $^{210}\text{Pb}_{\text{total}}$  activity ( $\circ$ ). (d, e) The resultant mean excess or unsupported  $^{210}\text{Pb}_{\text{excess}}$   
511 activity, corrected for  $^{226}\text{Ra}$ , outside the deposition event ( $\bullet$ ) superimposed on their  
512 respective stable sediment isotope tomography (SIT) simulations ( $\circ$ ), together with (f)  
513 their resultant POC sequestration rates for Mengkabong ( $\circ$ ) and Salut meadows ( $\bullet$ ). (g, h)  
514 Changes over time in the sedimentation and  $^{210}\text{Pb}_{\text{excess}}$  parameters as simulated by SIT in  
515 the Mengkabong and Salut sediment columns, with black circles indicating the actual  
516 recorded  $^{210}\text{Pb}_{\text{excess}}$  activity and white circles indicating the  $^{210}\text{Pb}_{\text{excess}}$  activity as modelled  
517 by SIT.

518 **Fig. 3.** Values of pH, PIC, DOC and ammonia measured in the sediments throughout the  
519 incubation experiment. (a) The pH of the sediment slurries from day 105 until the end of  
520 the anoxic incubation period. (b, c) The PIC content of the sediment. (d, e) The DOC  
521 content of the porewater of the sediment slurry. (f, g) The ammonia concentrations of the  
522 porewater of the sediment slurry. (b), (d) and (f) correspond to the surface 2 cm horizon,  
523 while (c), (e) and (g) correspond to the sediment collected from the 20–22 cm horizon. The  
524 last point in each series, indicated by a star ( $\star$ ), shows the final values of the sediments  
525 after a 30-day reoxygenation period. Error bars indicate standard error ( $n = 4$ ).

526 **Fig. 4.** Particulate organic matter (POC) content, Black Carbon (BC) content and loss of  
527 POC fraction of the sediments used over the anoxic incubation and subsequent

## Seagrass sediment decomposition and mineralisation

528 reoxygenation. The mean POC content, corresponding to (a) the surface 2 cm and (b) the  
529 sediment collected from the 20–22 cm horizon, is shown by the series marked by circles  
530 (●). The mean BC content is shown by the series marked by triangles (▲). Error bars  
531 indicate the standard error ( $n = 4$ ). The loss of the POC fraction over time in (c) the surface  
532 2 cm and (d) the sediment collected from the 20–22 cm horizon using the reactivity  
533 continuum model. Broken lines indicate the 95% confidence limit, as do the errors on the  
534 final point. The last point in each series, indicated by a star (☆) for the POC series and a  
535 square (■) for the BC series, shows the final value of the sediments after a 30-day  
536 reoxygenation period.

537 **Fig. 5.** Extrapolations of the fraction of remaining POC within the sediments over 100  
538 years following deposition. The broken line corresponds to the sediments collected from  
539 the 20–22 cm horizon, which were dated to deposition circa 1996, while the solid line  
540 corresponds to the sediments collected from the surface 2 cm, deposited in 2016.

541 **Fig. 6.** Cumulative CO<sub>2</sub> absorbed by soda lime and net loss of the POC fraction of the  
542 sediments used over the anoxic incubation. (a) and (b) correspond to the surface 2 cm and  
543 the sediment collected from the 20–22 cm horizon, respectively. Error bars indicate the  
544 standard error ( $n = 4$ ). The series indicated by circles (●) is the cumulative CO<sub>2</sub> absorbed  
545 over the course of the incubation, while the series indicated by triangles (▲) is the  
546 cumulative loss of POC over the same period.

547

## Seagrass sediment decomposition and mineralisation

548 **Table 1:** Dry mass of particulate sedimentary carbon and stable nitrogen isotopes and their  
549 molar ratios from the incubation jars. S and B refer to the surface (0–2 cm) and bottom  
550 (20–22 cm) horizons, followed by the day number during the incubation on which the  
551 sediments were extracted. All  $\delta^{13}\text{C}$  values have been normalised to preindustrial times  
552 (Suess effect) using their modelled depositional age. S0 and B0 are from single samples,  
553 while S210 and B210 are the means of four subsamples with their respective standard  
554 errors.

555

| Sample | $\delta^{13}\text{C}$ (‰) | C (%)       | N (%)        | N/C ratio      |
|--------|---------------------------|-------------|--------------|----------------|
| S0     | -24.61                    | 7.83        | 0.61         | 0.066          |
| S210   | -24.71 ± 0.04             | 7.64 ± 0.13 | 0.58 ± 0.004 | 0.065 ± 0.0007 |
| B0     | -24.06                    | 7.47        | 0.62         | 0.071          |
| B210   | -24.22 ± 0.03             | 7.61 ± 0.11 | 0.63 ± 0.004 | 0.070 ± 0.0007 |

556

## Seagrass sediment decomposition and mineralisation

### 557 **References**

- 558 Abdullah, M.H., and Tussin, A.M. (2014) Tropical cyclone, rough seas and severe weather  
559 monitoring and early warning system in Malaysia. [https://www.jma.go.jp/jma/jma-](https://www.jma.go.jp/jma/jma-eng/jma-center/rsmc-hp-pub-eg/2014_Effective_TC_Warning/presentation/11_March/country_report/Country_Report_Malaysia.pdf)  
560 [eng/jma-center/rsmc-hp-pub-](https://www.jma.go.jp/jma/jma-eng/jma-center/rsmc-hp-pub-eg/2014_Effective_TC_Warning/presentation/11_March/country_report/Country_Report_Malaysia.pdf)  
561 [eg/2014\\_Effective\\_TC\\_Warning/presentation/11\\_March/country\\_report/Country\\_Report\\_](https://www.jma.go.jp/jma/jma-eng/jma-center/rsmc-hp-pub-eg/2014_Effective_TC_Warning/presentation/11_March/country_report/Country_Report_Malaysia.pdf)  
562 [Malaysia.pdf](https://www.jma.go.jp/jma/jma-eng/jma-center/rsmc-hp-pub-eg/2014_Effective_TC_Warning/presentation/11_March/country_report/Country_Report_Malaysia.pdf)
- 563 Arndt, S., Jørgensen, B.B., LaRowe, D.E., Middelburg, J.J., Pancost, R.D., and Regnier, P.  
564 (2013) Quantifying the degradation of organic matter in marine sediments: A review and  
565 synthesis. *Earth-Science Reviews* **123**, 53-86.
- 566 Boehme, S.E., Blair, N.E., Chanton, J.P., and Martens, C.S. (1996) A mass balance of <sup>13</sup>C  
567 and <sup>12</sup>C in an organic-rich methane-producing marine sediment. *Geochimica et*  
568 *Cosmochimica Acta* **60**(20), 3835-3848.
- 569 Boudreau, B. (1991) On a reactive continuum representation of organic matter diagenesis.  
570 *American Journal of Sciences* **291**, 507-538.
- 571 Bray, M.S., Wu, J., Reed, B.C., Kretz, C.B., Belli, K.M., Simister, R.L., Henny, C.,  
572 Stewart, F.J., DiChristina, T.J., Brandes, J.A., Fowle, D.A., Crowe, S.A., and Glass, J.B.  
573 (2017) Shifting microbial communities sustain multiyear iron reduction and  
574 methanogenesis in ferruginous sediment incubations. *Geobiology* **15**(5), 678-689.
- 575 Burdige, D.J. (1991) The kinetics of organic matter mineralization in anoxic marine  
576 sediments. *Journal of Marine Research* **49**(4), 727-761.
- 577 Burdige, D.J. (2007) Preservation of organic matter in marine sediments: Controls,  
578 mechanisms, and an imbalance in sediment organic carbon budgets? *Chemical Reviews*  
579 **107**(2), 467-485.
- 580 Burdige, D.J., Komada, T., Magen, C., and Chanton, J.P. (2016) Modeling studies of  
581 dissolved organic matter cycling in Santa Barbara Basin (CA, USA) sediments.  
582 *Geochimica et Cosmochimica Acta* **195**, 100-119.
- 583 Canuel, E.A., Brush, G.S., Cronin, T.M., Lockwood, R., and Zimmerman, A.R. (2017)  
584 Paleoecology studies in Chesapeake Bay: a model system for understanding interactions  
585 between climate, anthropogenic activities and the environment. In Applications of  
586 paleoenvironmental techniques in estuarine studies. pp. 495-527. (Springer Netherlands)
- 587 Carroll, J., Lerche, I., Abraham, J.D., and Cisar, D.J. (1999) Sediment ages and flux  
588 variations from depth profiles of Pb-210: lake and marine examples. *Applied Radiation*  
589 *and Isotopes* **50**(4), 793-804.

## Seagrass sediment decomposition and mineralisation

- 590 Cebrian, J. (1999) Patterns in the fate of production in plant communities. *The American*  
591 *Naturalist* **154**(4), 449-468.
- 592 Chen, G., Azkab, M.H., Chmura, G.L., Chen, S., Sastrosuwondo, P., Ma, Z., Dharmawan,  
593 I.W.E., Yin, X., and Chen, B. (2017) Mangroves as a major source of soil carbon storage  
594 in adjacent seagrass meadows. *Scientific Reports* **7**, 42406.
- 595 Chew, S.T., and Gallagher, J.B. (2018) Accounting for black carbon lowers estimates of  
596 blue carbon storage services. *Scientific Reports* **8**(1), 2553.
- 597 Dharmakeerthi, R.S., Hanley, K., Whitman, T., Woolf, D., and Lehmann, J. (2015)  
598 Organic carbon dynamics in soils with pyrogenic organic matter that received plant residue  
599 additions over seven years. *Soil Biology and Biochemistry* **88**, 268-274.
- 600 Duarte, C.M., Kennedy, H., Marbà, N., and Hendriks, I. (2013) Assessing the capacity of  
601 seagrass meadows for carbon burial: Current limitations and future strategies. *Ocean &*  
602 *Coastal Management* **83**, 32-38.
- 603 Duarte, C.M., and Krause-Jensen, D. (2017) Export from Seagrass Meadows Contributes  
604 to Marine Carbon Sequestration. *Frontiers in Marine Science* **4**(13).
- 605 Gallagher, J.B. Explicit and implicit assumptions within the blue carbon conceptual model:  
606 A critique. In 'Proceedings of the International Conference on Marine Science and  
607 Aquaculture 2014 : Ecosystem perspectives in sustainable development ', 18-20 March  
608 2014, Kota Kinabalu, Sabah, Malaysia. (Ed. S Mustafa), pp. 26-40.
- 609 Gallagher, J.B. (2015) The implications of global climate change and aquaculture on blue  
610 carbon sequestration and storage within submerged aquatic ecosystems. In *Aquaculture*  
611 *Ecosystems*. (Eds. S Mustafa and R Shapawi) pp. 243-280. (Wiley Blackwell: Oxford)
- 612 Gallagher, J.B. (2017) Taking stock of mangrove and seagrass blue carbon ecosystems: A  
613 perspective for future carbon trading. *Borneo Journal of Marine Science and Aquaculture*  
614 **1**(1), 71-74.
- 615 Gallagher, J.B., and Ross, D.J. (2017) Sediment geochronology for bar-built estuaries  
616 subject to flood deposition and erosion: A robust multiproxy approach across an estuarine  
617 zone. *The Holocene* **28**(3), 341-353.
- 618 Galman, V., Rydberg, J., and Bigler, C. (2009) Decadal diagenetic effects on delta C-13  
619 and delta N-15 studied in varved lake sediment. *Limnology and Oceanography* **54**(3), 917-  
620 924.
- 621 Galman, V., Rydberg, J., Bindler, R., and Renberg, I. (2008) Carbon and nitrogen loss  
622 rates of lake sediment: Changes over 27 years studied in varved lake sediment. *Limnology*  
623 *and Oceanography* **53**(3), 917-924.

## Seagrass sediment decomposition and mineralisation

- 624 Gaveau, D.L.A., Salim, M.A., Hergoualc'h, K., Locatelli, B., Sloan, S., Wooster, M.,  
625 Marlier, M.E., Molidena, E., Yaen, H., DeFries, R., Verchot, L., Murdiyarso, D., Nasi, R.,  
626 Holmgren, P., and Sheil, D. (2014) Major atmospheric emissions from peat fires in  
627 Southeast Asia during non-drought years: evidence from the 2013 Sumatran fires.  
628 *Scientific Reports* **4**, 6112.
- 629 Gewert, B., Plassmann, M.M., and MacLeod, M. (2015) Pathways for degradation of  
630 plastic polymers floating in the marine environment. *Environmental Science: Processes &*  
631 *Impacts* **17**(9), 1513-1521.
- 632 Gonnee, M.E., Paytan, A., and Herrera-Silveira, J.A. (2004) Tracing organic matter  
633 sources and carbon burial in mangrove sediments over the past 160 years. *Estuarine,*  
634 *Coastal and Shelf Science* **61**(2), 211-227.
- 635 Harvey, E.T., Kratzer, S., and Andersson, A. (2015) Relationships between colored  
636 dissolved organic matter and dissolved organic carbon in different coastal gradients of the  
637 Baltic Sea. *Ambio* **44**(3), 392-401.
- 638 Hee, C.A., Pease, T.K., Alperin, M.J., and Martens, C.S. (2001) Dissolved organic carbon  
639 production and consumption in anoxic marine sediments: A pulsed-tracer experiment.  
640 *Limnology and Oceanography* **46**(8), 1908-1920.
- 641 Heiri, O., Lotter, A.F., and Lemcke, G. (2001) Loss on ignition as a method for estimating  
642 organic and carbonate content in sediments: reproducibility and comparability of results.  
643 *Journal of Paleolimnology* **25**(1), 101-110.
- 644 Holmer, M. (1996) Composition and fate of dissolved organic carbon derived from  
645 phytoplankton detritus in coastal marine sediments. *Marine Ecology Progress Series*  
646 **141**(1-3), 217-228.
- 647 Howard, J.L., Creed, J.C., Aguiar, M.V.P., and Fouquerean, J.W. (2017) CO<sub>2</sub> released by  
648 carbonate sediment production in some coastal areas may offset the benefits of seagrass  
649 “Blue Carbon” storage. *Limnology and Oceanography*, **63**(1),160-172.
- 650 Kaeriyama, H. (2017) Oceanic dispersion of Fukushima-derived radioactive cesium: a  
651 review. *Fisheries Oceanography* **26**(2), 99-113.
- 652 Keith, H., and Wong, S.C. (2006) Measurement of soil CO<sub>2</sub> efflux using soda lime  
653 absorption: both quantitative and reliable. *Soil Biology and Biochemistry* **38**(5), 1121-  
654 1131.
- 655 Kennedy, H., Beggins, J., Duarte, C.M., Fourqurean, J.W., Holmer, M., Marba, N., and  
656 Middelburg, J.J. (2010) Seagrass sediments as a global carbon sink: Isotopic constraints.  
657 *Global Biogeochemical Cycles* **24**, GB4026.

## Seagrass sediment decomposition and mineralisation

- 658 Koelmans, A.A., and Prevo, L. (2003) Production of dissolved organic carbon in aquatic  
659 sediment suspensions. *Water Res* **37**(9), 2217-22.
- 660 Koeve, W., and Kähler, P. (2010) Heterotrophic denitrification vs. autotrophic anammox –  
661 quantifying collateral effects on the oceanic carbon cycle. *Biogeosciences* **7**(8), 2327-2337.
- 662 Koschorreck, M. (2008) Microbial sulphate reduction at a low pH. *FEMS Microbiology*  
663 *Ecology* **64**(3), 329-342.
- 664 Kristensen, E. (1994) Decomposition of microalgae, vascular plants and sediment detritus  
665 in seawater- use of stepwise thermogravimetry. *Biogeochemistry* **26**(1), 1-24.
- 666 Kristensen, E., Ahmed, S.I., and Devol, A.H. (1995) Aerobic and anaerobic decomposition  
667 of organic matter in marine sediment: Which is fastest? *Limnology and Oceanography*  
668 **40**(8), 1430-1437.
- 669 Lavelle, J.W., Massoth, G.J., and A., C.E. (1985) Sedimentation rates in Puget sound from  
670 <sup>210</sup>Pb measurements. Pacific Marine Research Laboratory, *NOAA technical memorandum*  
671 *ERL PMEL-61* (Sequim).
- 672 Li, R., Zhang, L., Xue, B., and Wang, Y. (2019) Abundance and characteristics of  
673 microplastics in the mangrove sediment of the semi-enclosed Maowei Sea of the south  
674 China sea: New implications for location, rhizosphere, and sediment compositions.  
675 *Environmental Pollution* **244**, 685-692.
- 676 Liang, B., Lehmann, J., Solomon, D., Sohi, S., Thies, J.E., Skjemstad, J.O., Luizão, F.J.,  
677 Engelhard, M.H., Neves, E.G., and Wirrick, S. (2008) Stability of biomass-derived black  
678 carbon in soils. *Geochimica et Cosmochimica Acta* **72**, 6069-6078.
- 679 Lipton, P. (2000) Inference to the best explanation. In *A companion to the philosophy of*  
680 *science*. (Ed. WH Newton-Smith) pp. 184-193. (Blackwell)
- 681 Liu, J., Carroll, J.L., and Lerche, I. (1991) A technique for disentangling temporal source  
682 and sediment variations from radioactive isotope measurements with depth. *Nuclear*  
683 *Geophysics* **5**(1-2), 31-45.
- 684 Marchand, C., Baltzer, F., Lallier-Vergès, E., and Albéric, P. (2004) Pore-water chemistry  
685 in mangrove sediments: relationship with species composition and developmental stages  
686 (French Guiana). *Marine Geology* **208**(2), 361-381.
- 687 McLeod, E., Chmura, G., Bouillon, S., Salm, R., Björk, M., Duarte, C., Lovelock, C.,  
688 Schlesinger, W., and R Silliman, B. (2011) 'A blueprint for blue carbon: Toward an  
689 improved understanding of the role of vegetated coastal habitats in sequestering CO<sub>2</sub>.  
690 *Frontiers in Ecology and the Environment* **9**(10), 552-560.

## Seagrass sediment decomposition and mineralisation

- 691 Middelburg, J.J. (1989) A simple rate model for organic matter decomposition in marine  
692 sediments. *Geochimica Et Cosmochimica Acta* **53**(7), 1577-1581.
- 693 Mostovaya, A., Hawkes, J.A., Koehler, B., Dittmar, T., and Tranvik, L.J. (2017)  
694 Emergence of the Reactivity Continuum of Organic Matter from Kinetics of a Multitude of  
695 Individual Molecular Constituents. *Environ Sci Technol* **51**(20), 11571-11579.
- 696 Mucci, A., Sundby, B., Gehlen, M., Arakaki, T., Zhong, S., and Silverberg, N. (2000) The  
697 fate of carbon in continental shelf sediments of eastern Canada: a case study. *Deep Sea*  
698 *Research Part II: Topical Studies in Oceanography* **47**(3), 733-760.
- 699 Ni, S.-Q., and Zhang, J. (2013) Anaerobic Ammonium Oxidation: From Laboratory to  
700 Full-Scale Application. *BioMed Research International* **2013**, 10.
- 701 Nor, N.H., and Obbard, J.P. (2014) Microplastics in Singapore's coastal mangrove  
702 ecosystems. *Marine Pollution Bulletin* **79**(1-2), 278-83.
- 703 Pendleton, L., Donato, D.C., Murray, B.C., Crooks, S., Jenkins, W.A., Sifleet, S., Craft,  
704 C., Fourqurean, J.W., Kauffman, J.B., Marba, N., Megonigal, P., Pidgeon, E., Herr, D.,  
705 Gordon, D., and Baldera, A. (2012) Estimating Global "Blue Carbon" Emissions from  
706 Conversion and Degradation of Vegetated Coastal Ecosystems. *PLoS ONE* **7**(9).
- 707 Rassmann, J., Lansard, B., Pozzato, L., and Rabouille, C. (2016) Carbonate chemistry in  
708 sediment porewaters of the Rhône River delta driven by early diagenesis (northwestern  
709 Mediterranean). *Biogeosciences* **13**(18), 5379-5394.
- 710 Rillig, M.C. (2018) Microplastic Disguising As Soil Carbon Storage. *Environmental*  
711 *Science & Technology* **52**(11), 6079-6080.
- 712 Salk, K.R., Erler, D.V., Eyre, B.D., Carlson-Perret, N., and Ostrom, N.E. (2017)  
713 Unexpectedly high degree of anammox and DNRA in seagrass sediments: Description and  
714 application of a revised isotope pairing technique. *Geochimica et Cosmochimica Acta* **211**,  
715 64-78.
- 716 Santisteban, J.I., Mediavilla, R., Lopez-Pamo, E., Dabrio, C.J., Zapata, M.B.R., Garcia,  
717 M.J.G., Castano, S., and Martinez-Alfaro, P.E. (2004) Loss on ignition: a qualitative or  
718 quantitative method for organic matter and carbonate mineral content in sediments?  
719 *Journal of Paleolimnology* **32**(3), 287-299.
- 720 Siikamäki, J., Sanchirico, J.N., Jardine, S., McLaughlin, D., and Morris, D. (2013) Blue  
721 Carbon: Coastal Ecosystems, Their Carbon Storage, and Potential for Reducing Emissions.  
722 *Environment: Science and Policy for Sustainable Development* **55**(6), 14-29.
- 723 Sophia, C.J., and Robie, W.M. (2016) Geoengineering with seagrasses: is credit due where  
724 credit is given? *Environmental Research Letters* **11**(11), 113001.



## Seagrass sediment decomposition and mineralisation

- 725 Strickland, J.D.H., and Parsons, T.R. (1968) 'A Practical Manual of Seawater Analysis.'  
726 (Queens Printer: Ottawa, Ontario)
- 727 Tarutis, W.J. (1993) On the equivalence of the power and reactive continuum models of  
728 organic matter diagenesis. *Geochimica et Cosmochimica Acta* **57**(6), 1349-1350.
- 729 Wang, J., Xiong, Z., and Kuzyakov, Y. (2016) Biochar stability in soil: meta-analysis of  
730 decomposition and priming effects. *GCB Bioenergy* **8**(3), 512-523.
- 731 Westrich, J.T., and Berner, R.B. (1984) The role of sedimentary organic matter in bacterial  
732 sulfate reduction: The G model tested *Limnology and Oceanography* **29**(2), 236-249.
- 733 Zimmerman, A.R., and Canuel, E.A. (2002) Sediment geochemical records of  
734 eutrophication in the mesohaline Chesapeake Bay. *Limnology and Oceanography* **47**(4),  
735 1084-1093.
- 736

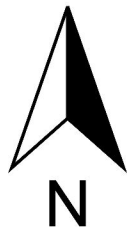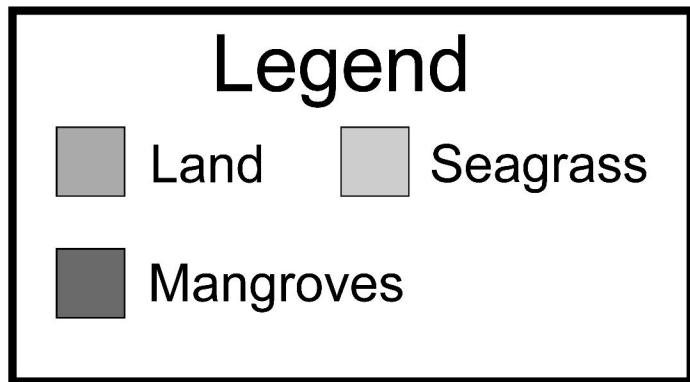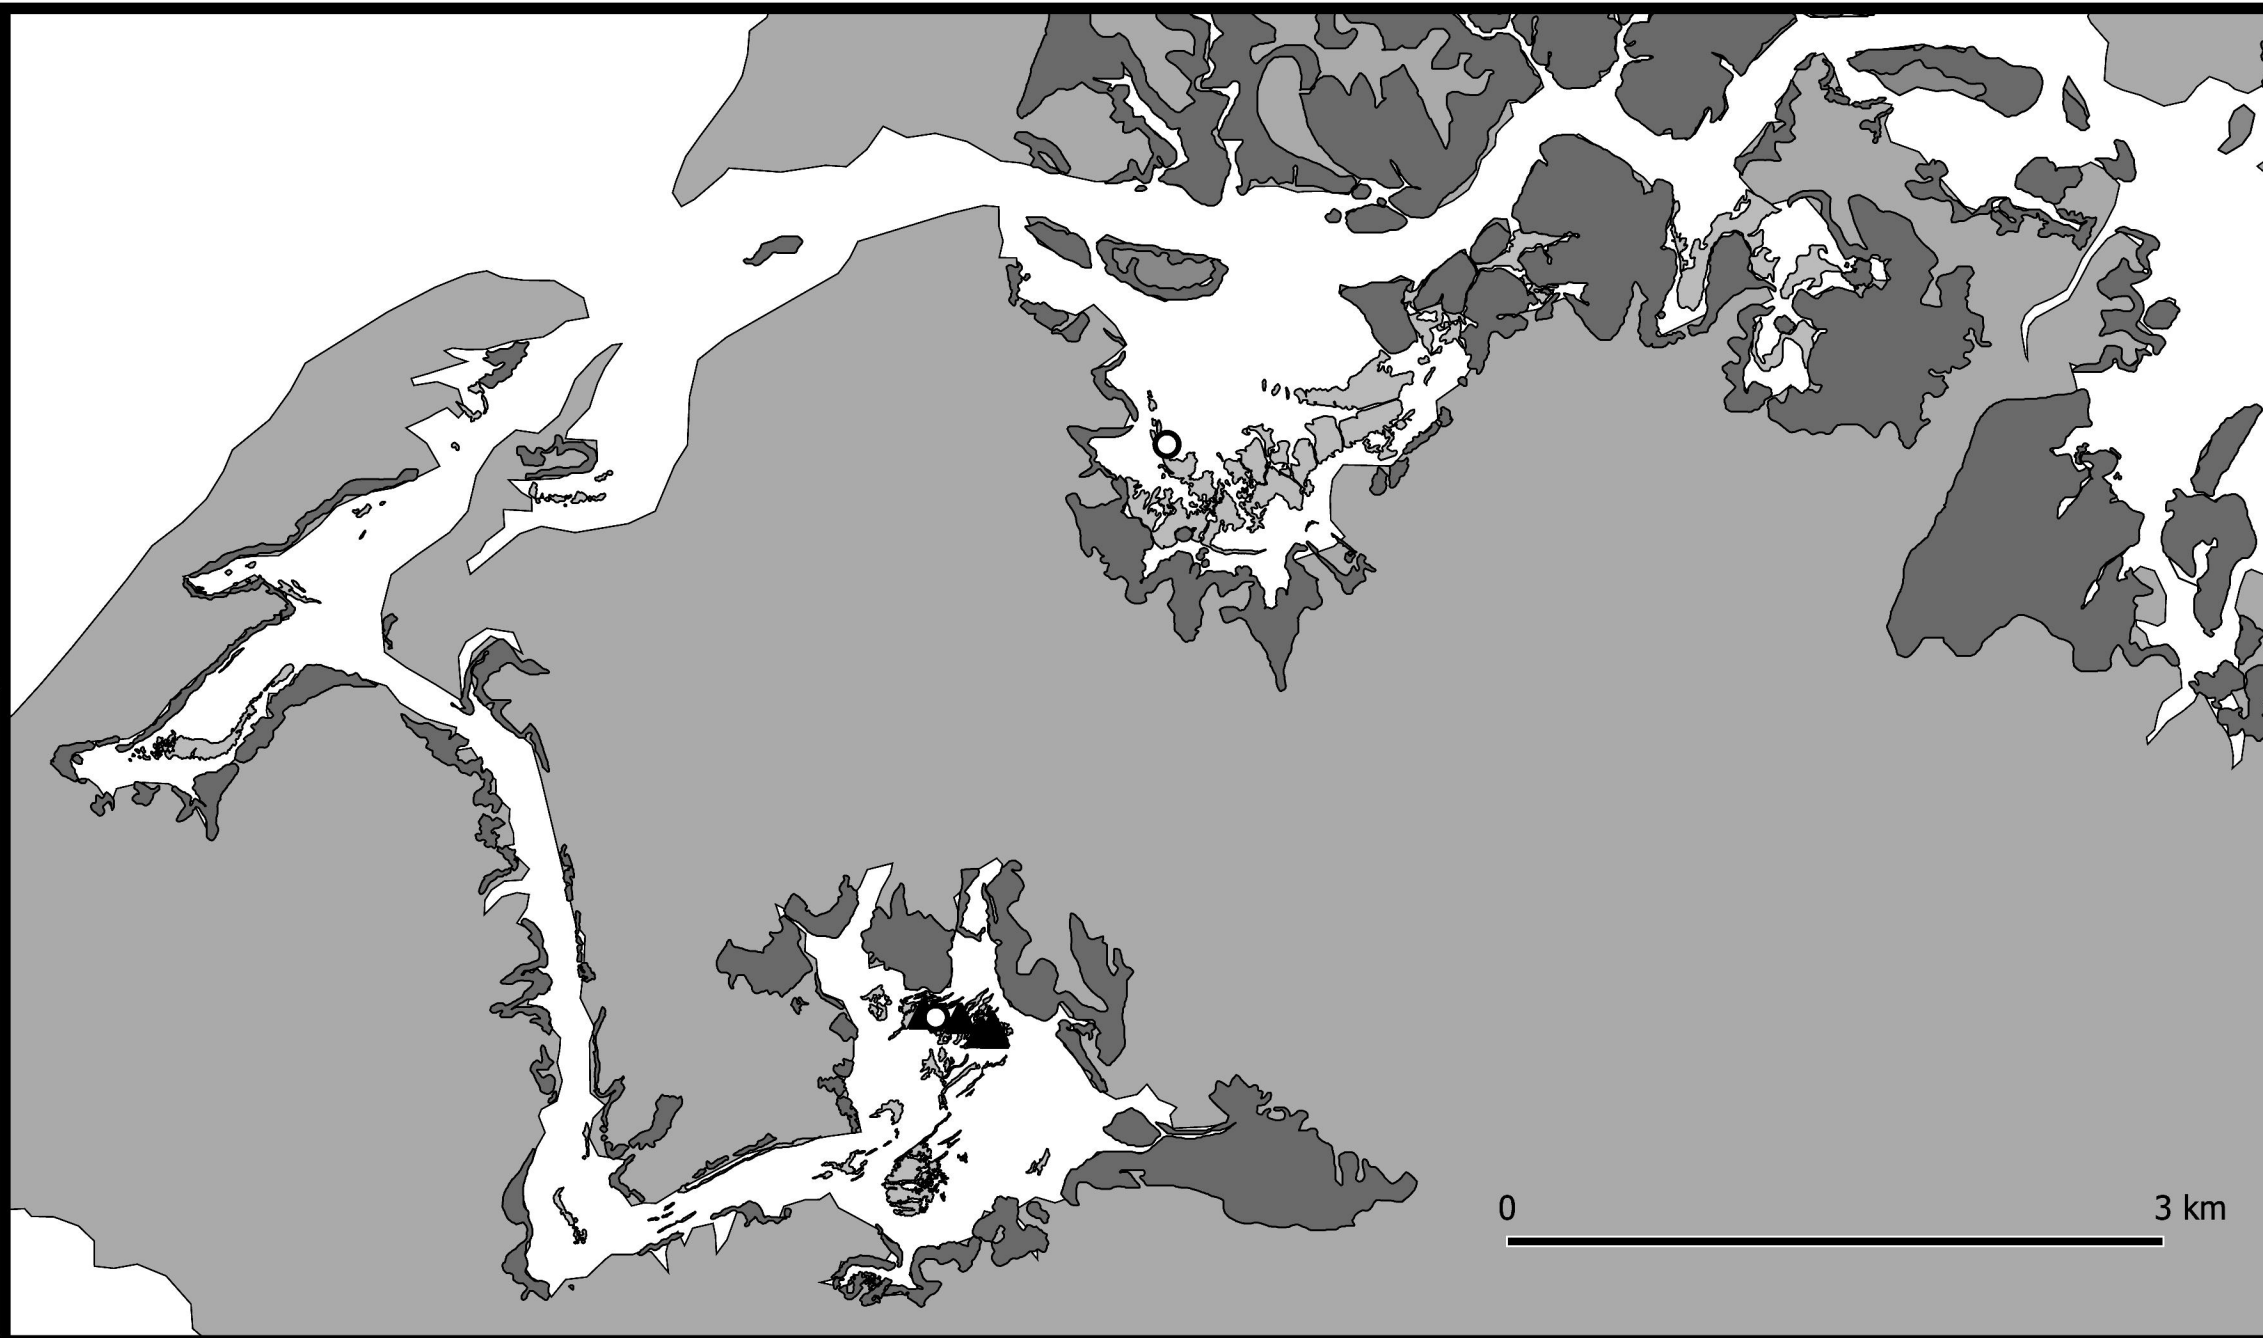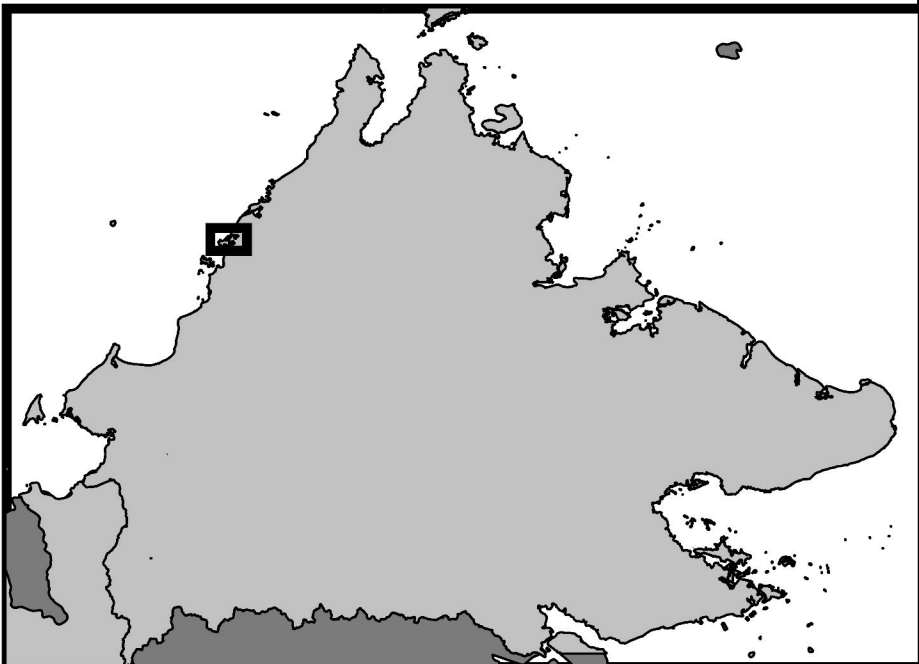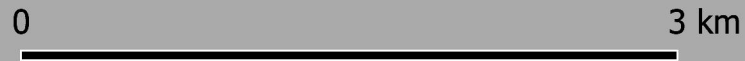

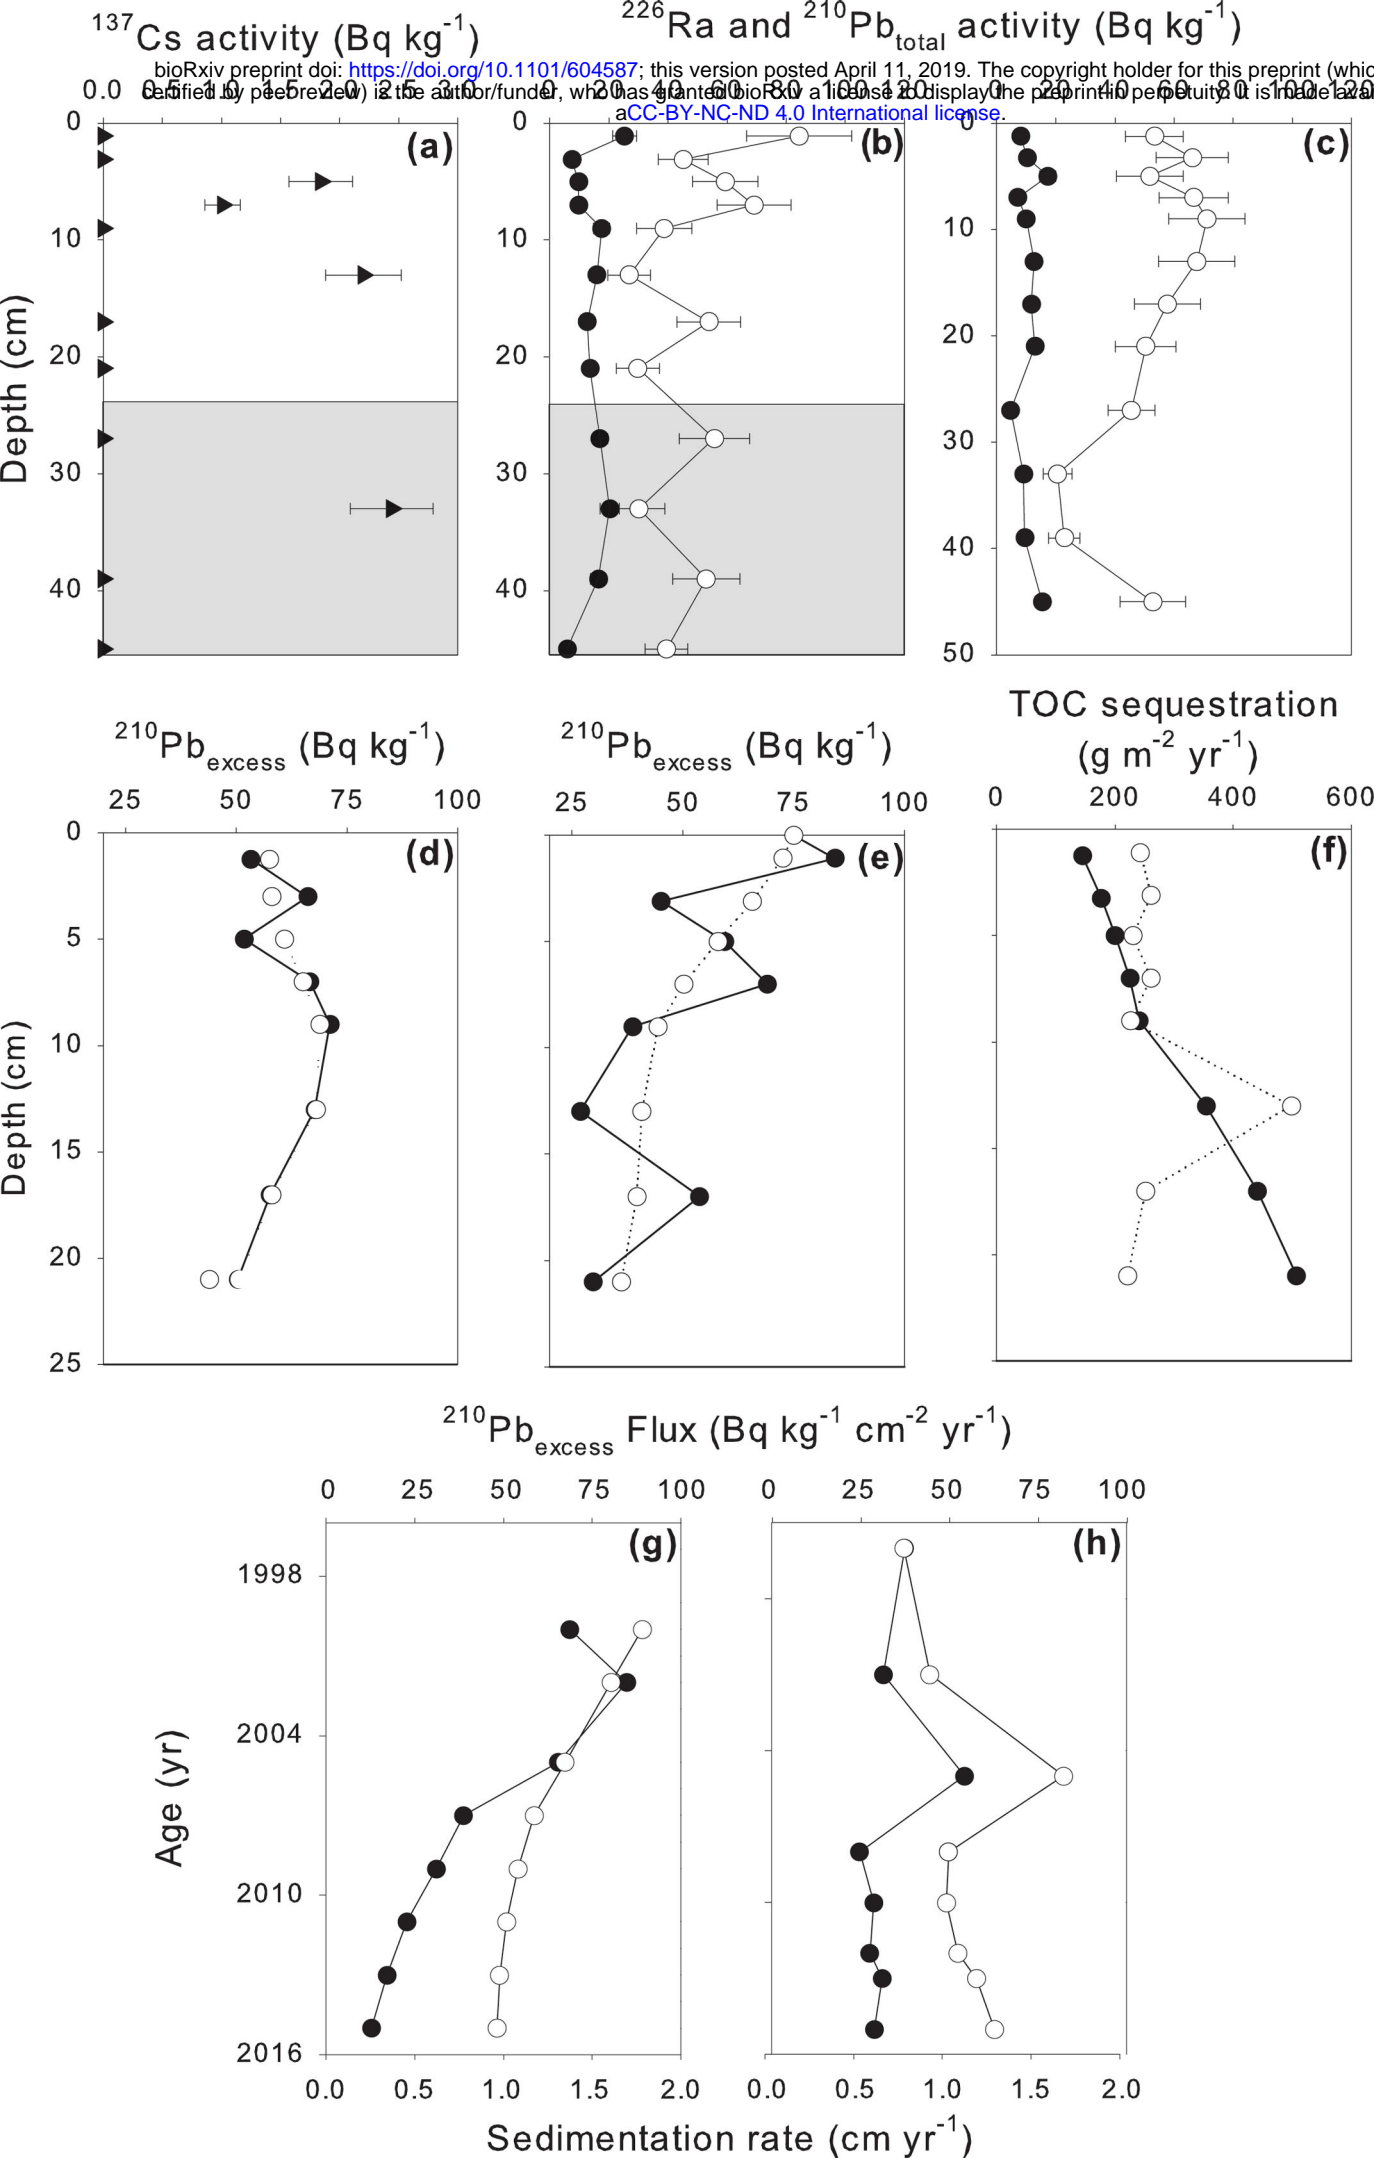

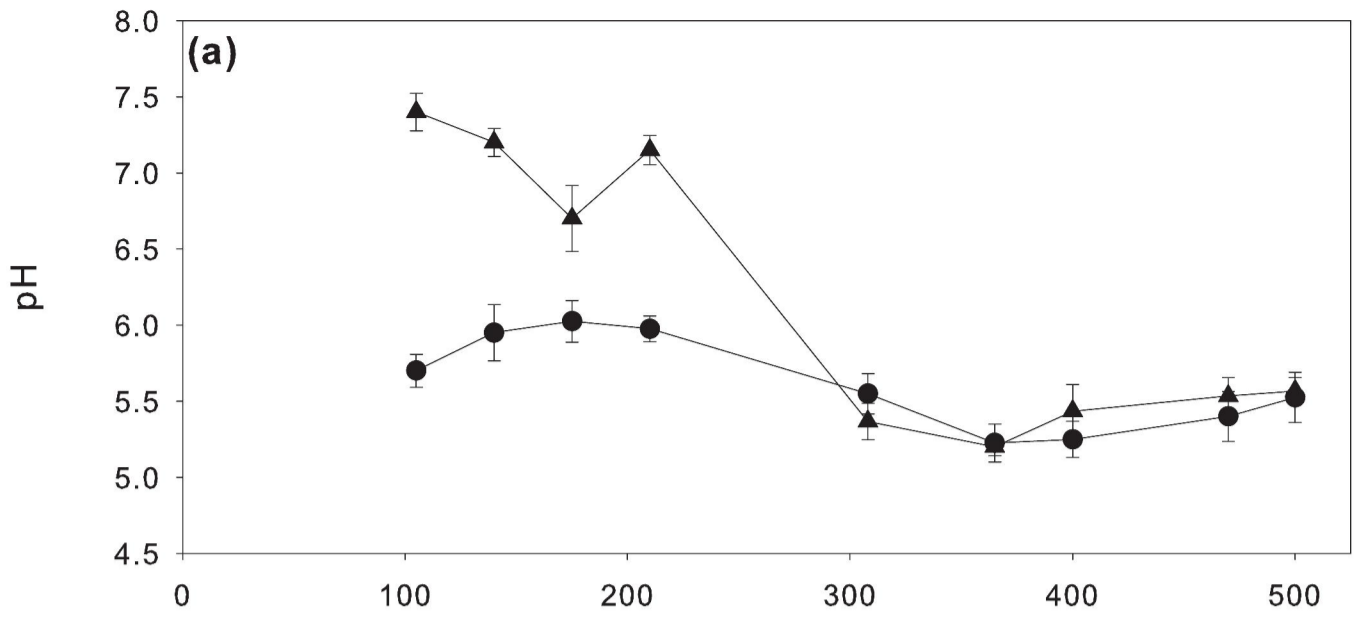

bioRxiv preprint doi: <https://doi.org/10.1101/604587>; this version posted April 11, 2019. The copyright holder for this preprint (which was not certified by peer review) is the author/funder, who has granted bioRxiv a license to display the preprint in perpetuity. It is made available under aCC-BY-NC-ND 4.0 International license.

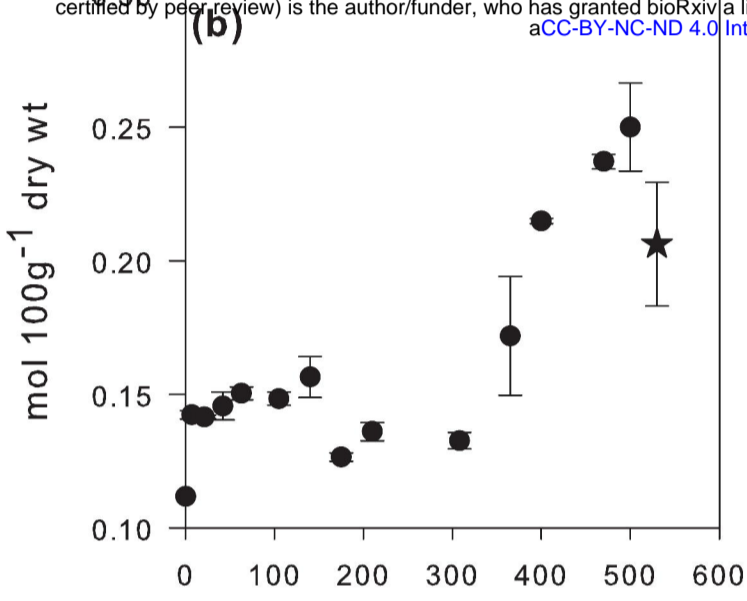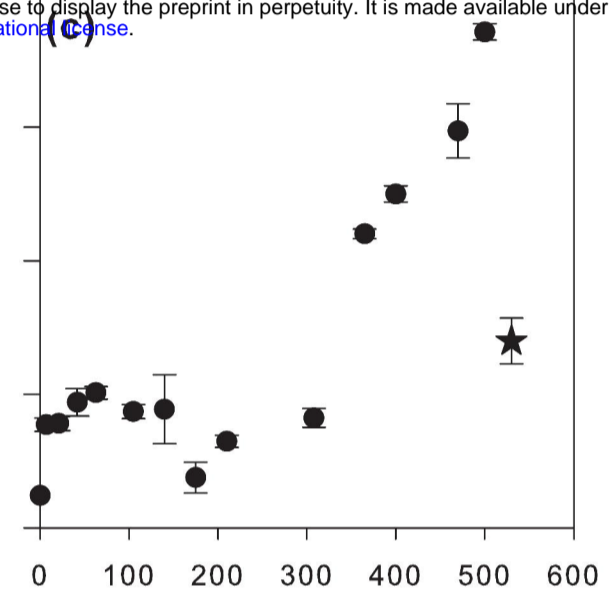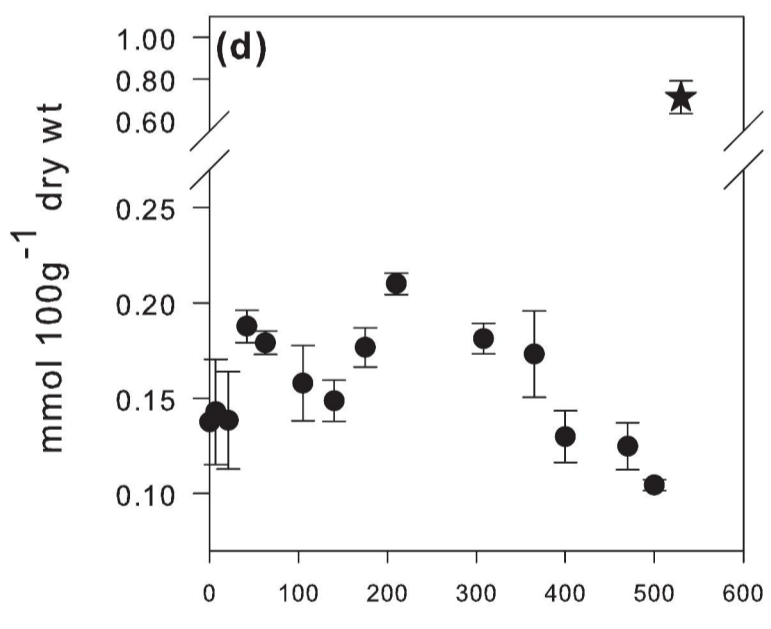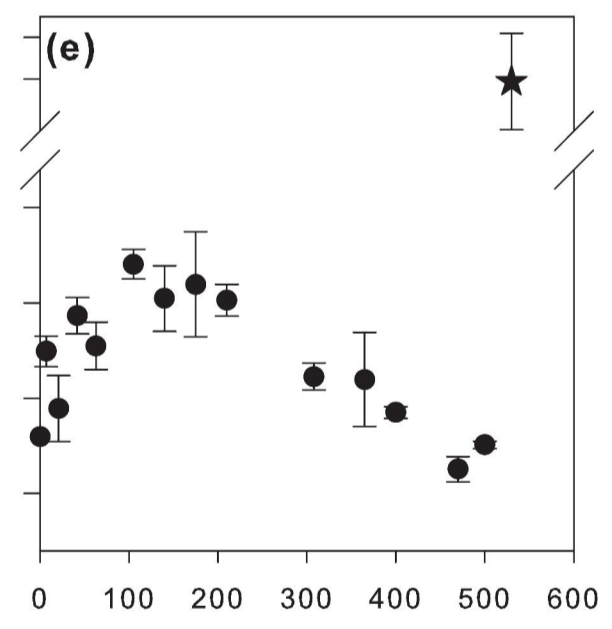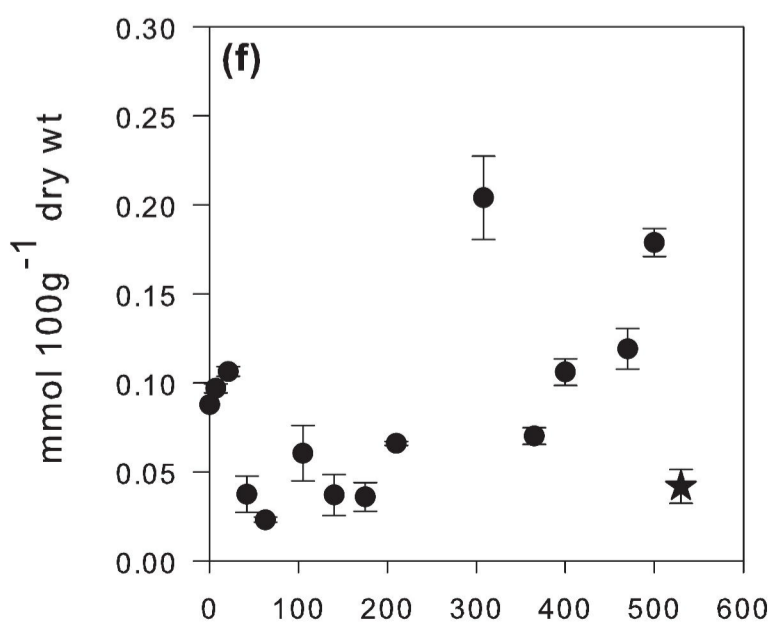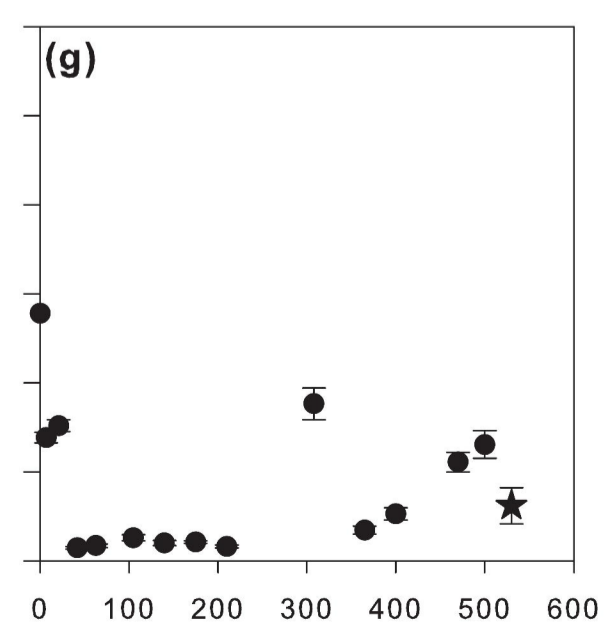

Time (days)

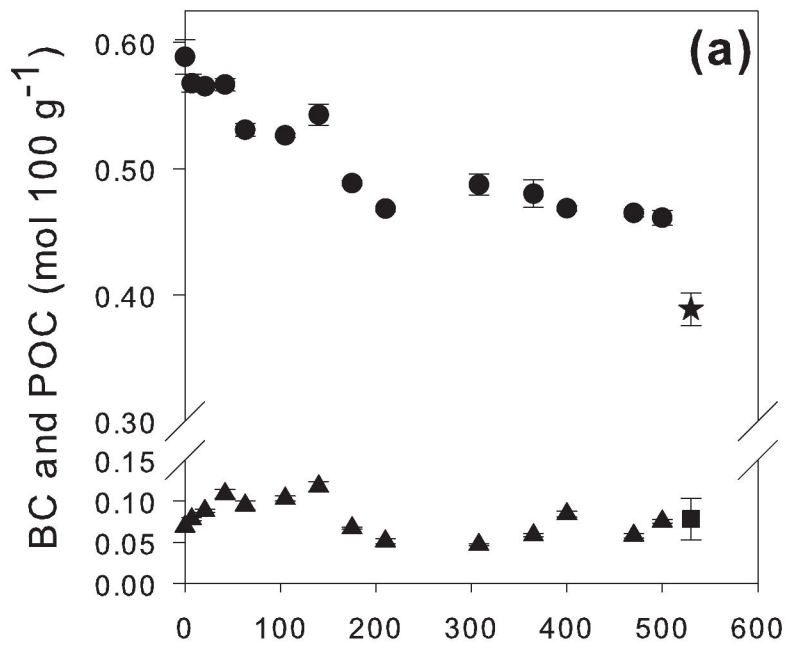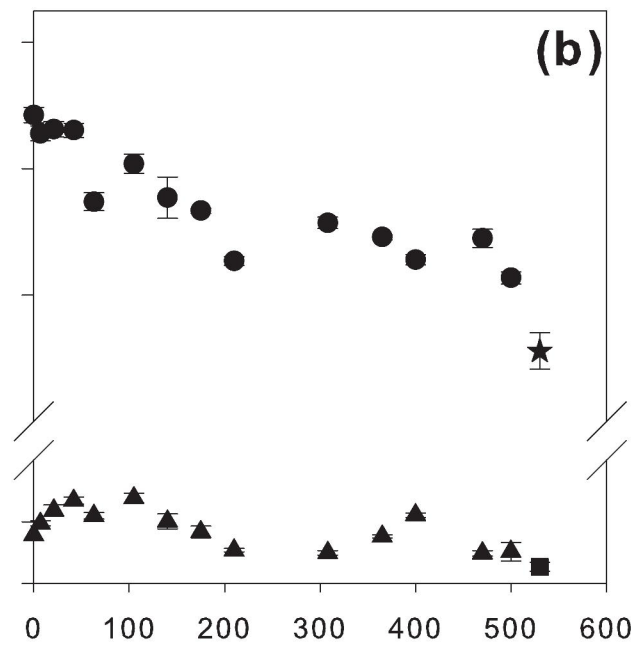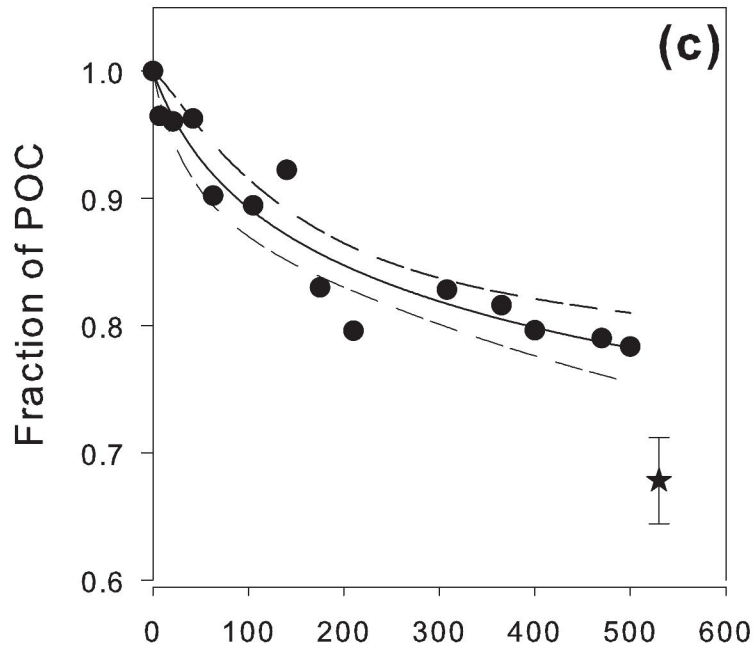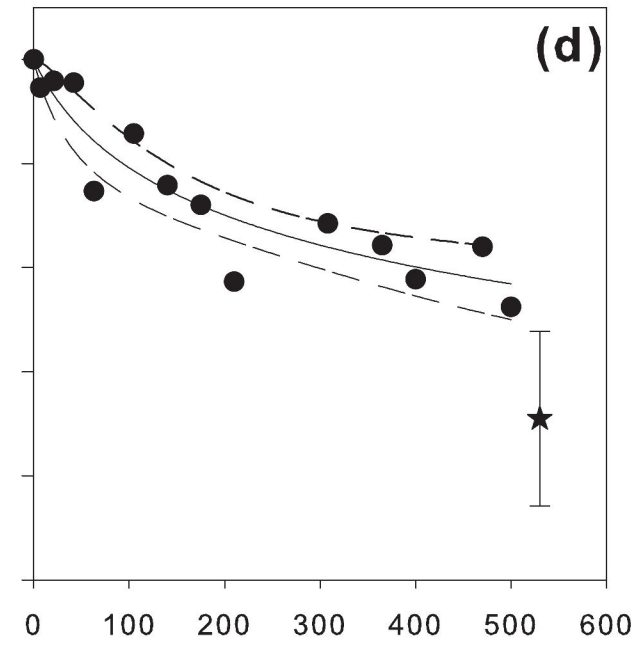

Time (days)

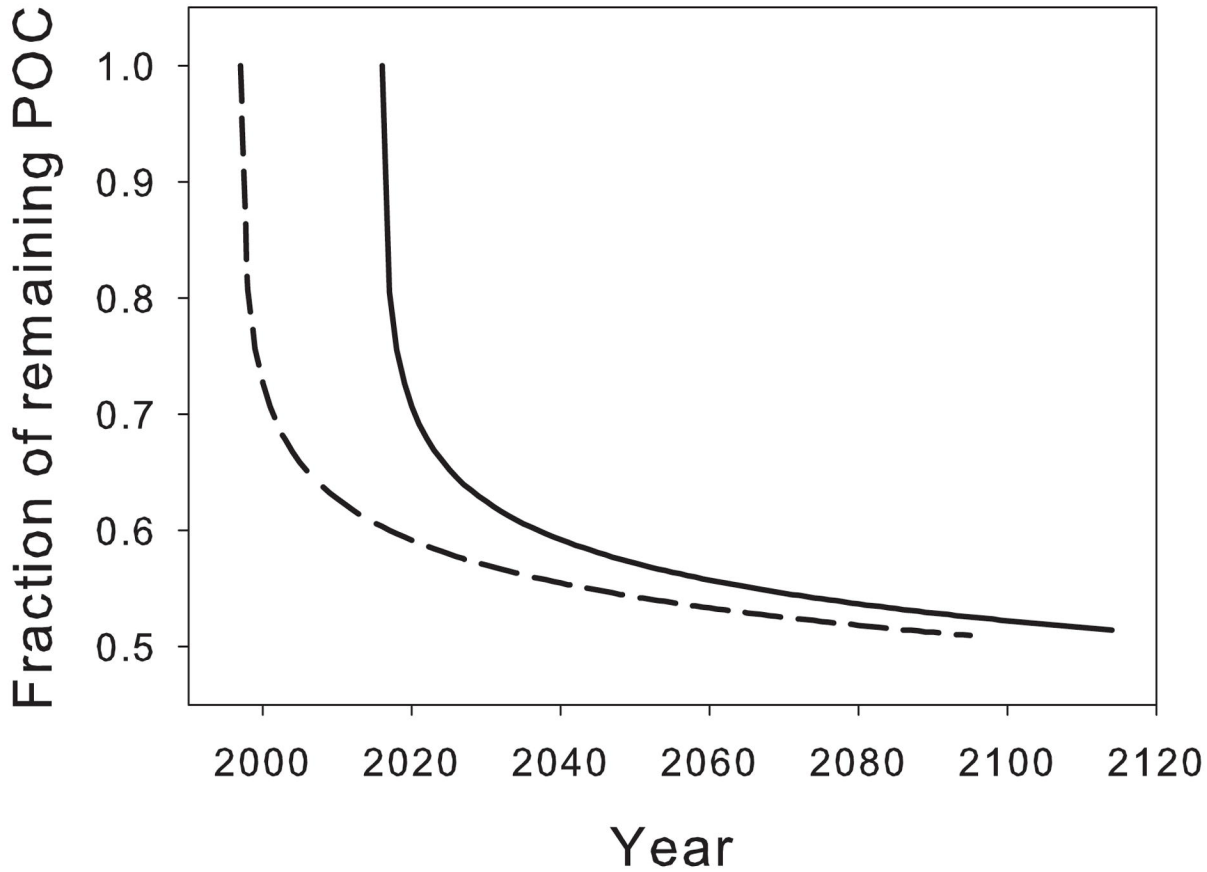

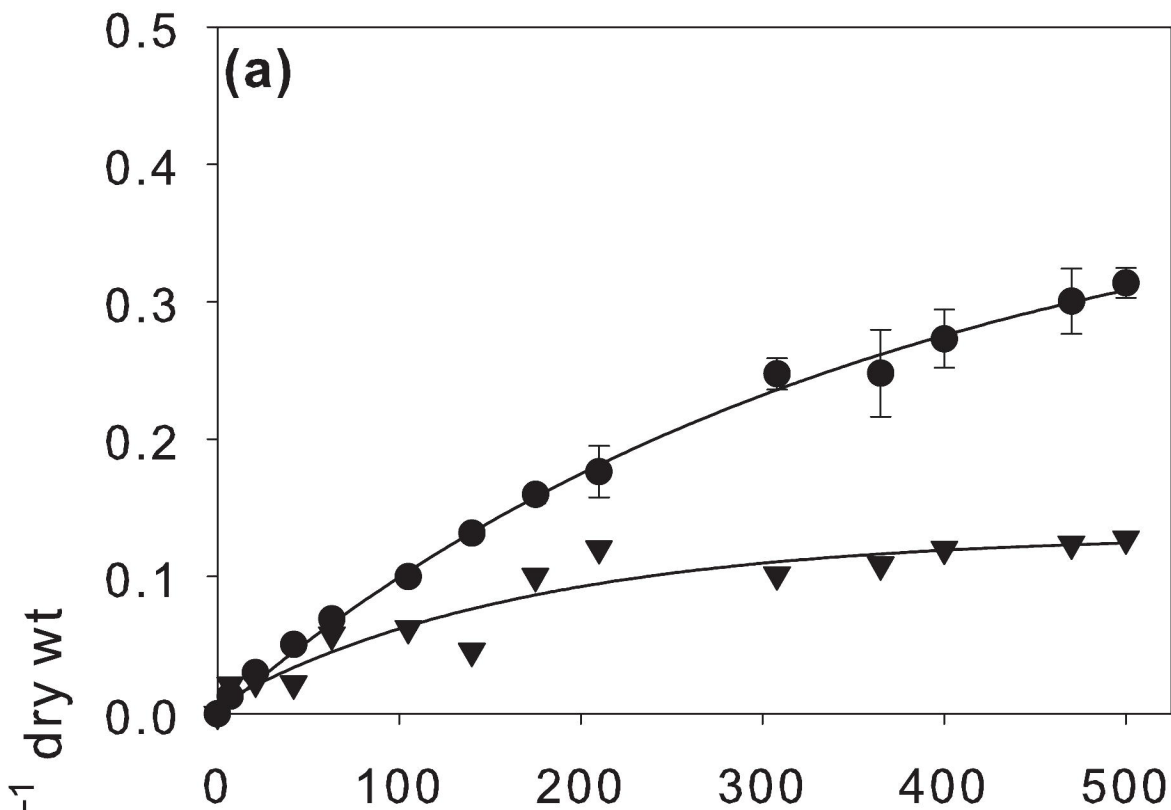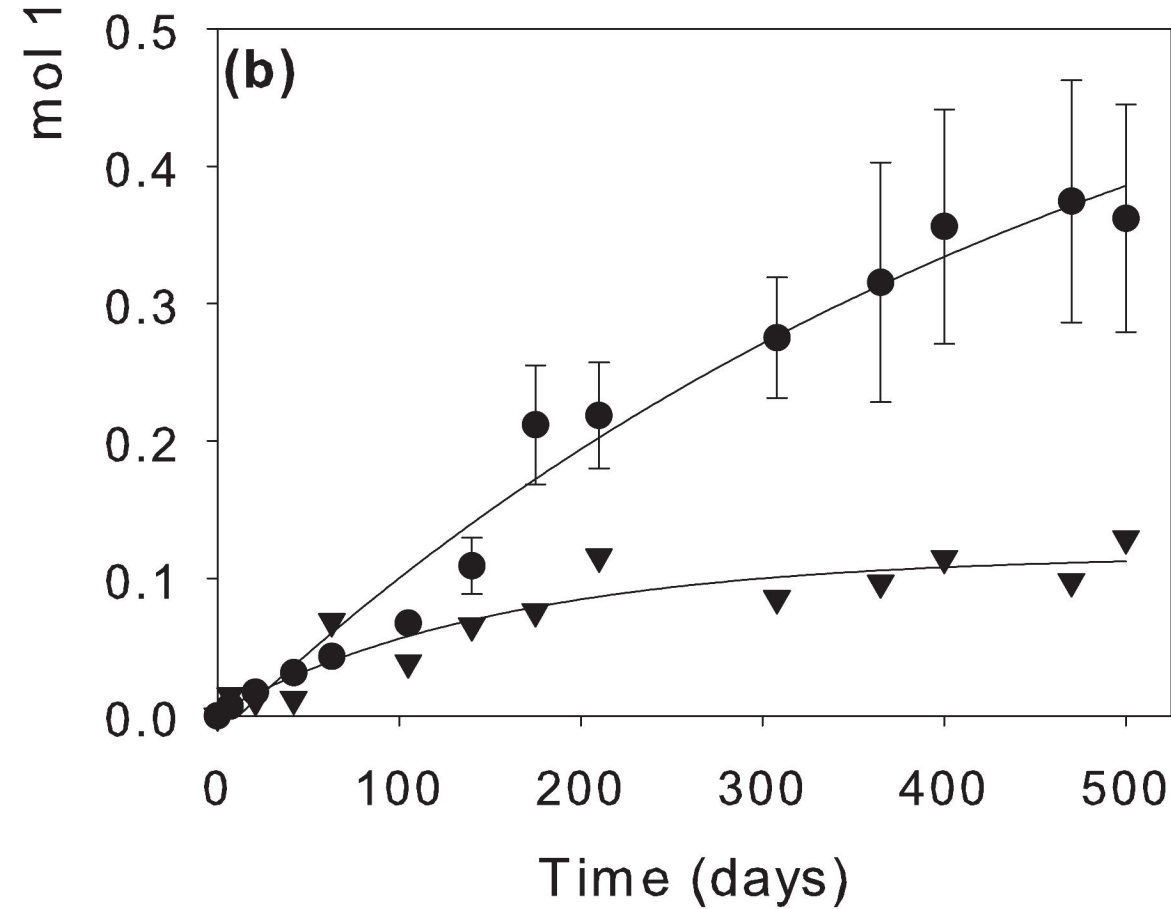

Source: https://www.biorxiv.org/content/10.1101/604587v1.full.pdf
